# Supplementary material for: Energy differences as descriptors for the correlation betweenJSCandVOCin nonfullerene organic photovoltaics
Source: Royal Society of Chemistry journal article supplement (doi:10.1039/d3cc01904g), 2023-01-01
Supplement: d3cc01904g1.pdf [file d3cc01904g1.pdf]

# Supporting Information

## Energy Differences as Descriptors for the Correlation between $J_{SC}$ and $V_{OC}$ in Nonfullerene Organic Photovoltaics

Yue Ren<sup>a</sup>, Ming-Yang Li<sup>a</sup>, Ming-Yue Sui<sup>a</sup>, Guang-Yan Sun<sup>a,b,\*</sup>, and Zhong-Min Su<sup>a,c,\*</sup>

<sup>a</sup> Department of Chemistry, Faculty of Science, Yanbian University, Yanji 133002, P. R. China.  
Email: gysun@ybu.edu.cn (Guang-Yan Sun)

<sup>b</sup> School of Applied Chemistry and Materials, Zhuhai College of Science and Technology, Zhuhai 519041, P. R. China.

<sup>c</sup> Laboratory of Theoretical and Computational Chemistry, Institute of Theoretical Chemistry, College of Chemistry, Jilin University, Changchun 130023, P. R. China. Email: zmsu@nenu.edu.cn (Zhong-Min Su)

Co-first department: the **two departments** of Zhuhai College of Science and Technology and Yanbian University contributed equally to this work.

### Table of Contents

|                                                                                    |    |
|------------------------------------------------------------------------------------|----|
| I. Calculation Results .....                                                       | 2  |
| II. Calculation Methods.....                                                       | 17 |
| III. Machine learning model: prediction of positive and negative correlation ..... | 17 |
| IV. Appendix Full Name.....                                                        | 19 |
| V. References.....                                                                 | 19 |

---

\* Corresponding author.

Email: gysun@ybu.edu.cn (Guang-Yan Sun)

\* Corresponding author.

Email: zmsu@nenu.edu.cn (Zhong-Min Su)

Co-first department: the two departments of Zhuhai College of Science and Technology and Yanbian University contributed equally to this work.

## I. Calculation Results

$$\begin{aligned}
 \Delta E_g &= (E_g)_2 - (E_g)_1 \\
 &= (E_{\text{LUMO}}^{\text{A}_2} - E_{\text{HOMO}}^{\text{A}_2}) - (E_{\text{LUMO}}^{\text{A}_1} - E_{\text{HOMO}}^{\text{A}_1}) \\
 &= (E_{\text{LUMO}}^{\text{A}_2} - E_{\text{LUMO}}^{\text{A}_1}) - (E_{\text{HOMO}}^{\text{A}_2} - E_{\text{HOMO}}^{\text{A}_1}) \\
 &= \Delta E_{\text{LUMO}} - \Delta E_{\text{HOMO}} \\
 \Delta(\Delta E_1) &= (\Delta E_1)_2 - (\Delta E_1)_1 \\
 &= (E_{\text{LUMO}}^{\text{D}} - E_{\text{LUMO}}^{\text{A}_2}) - (E_{\text{LUMO}}^{\text{D}} - E_{\text{LUMO}}^{\text{A}_1}) \\
 &= E_{\text{LUMO}}^{\text{A}_1} - E_{\text{LUMO}}^{\text{A}_2} \\
 &= -\Delta E_{\text{LUMO}}
 \end{aligned}
 \tag{S1}$$

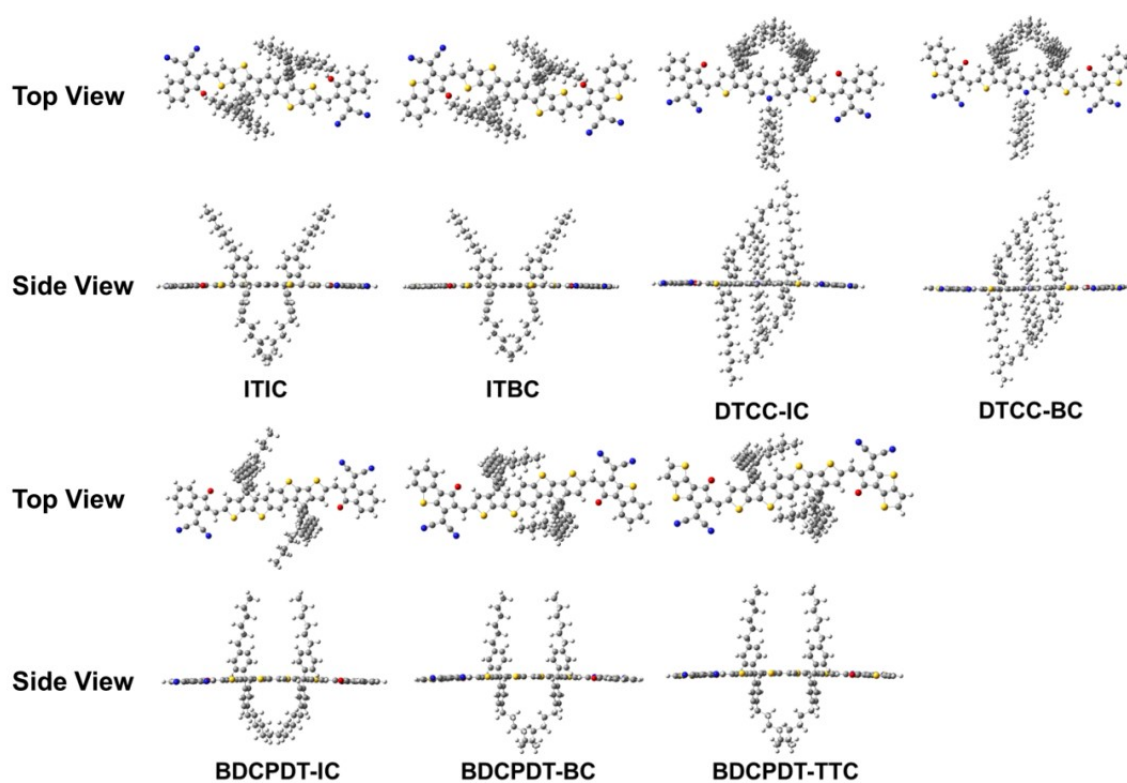

**Figure S1.** The most stable monomeric conformations of ITIC-series acceptors are optimized adopted density functional theory.

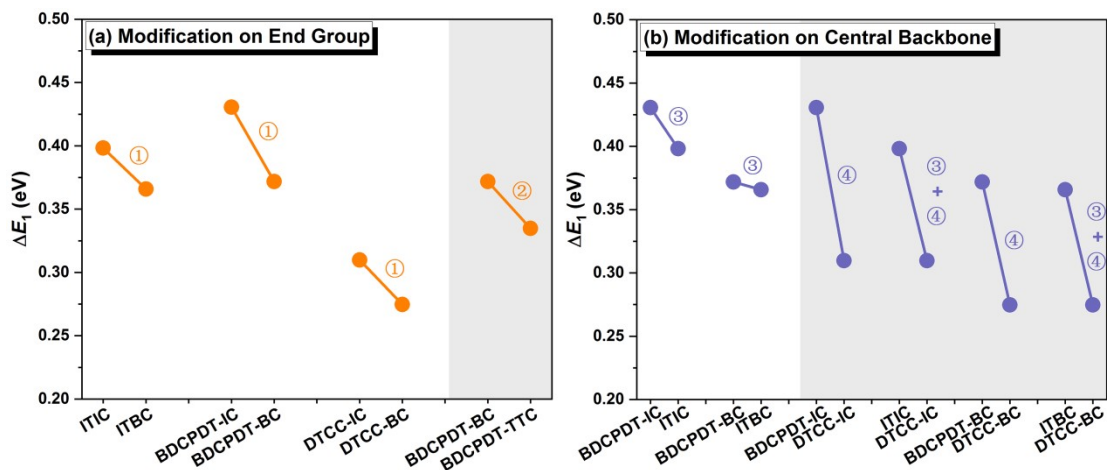

**Figure S2.** Calculated the energy driving force ( $\Delta E_1$ , eV) of 10 groups' devices with modification on (a) end group and (b) central backbone of each group, the shadow filling part represents negative correlation.

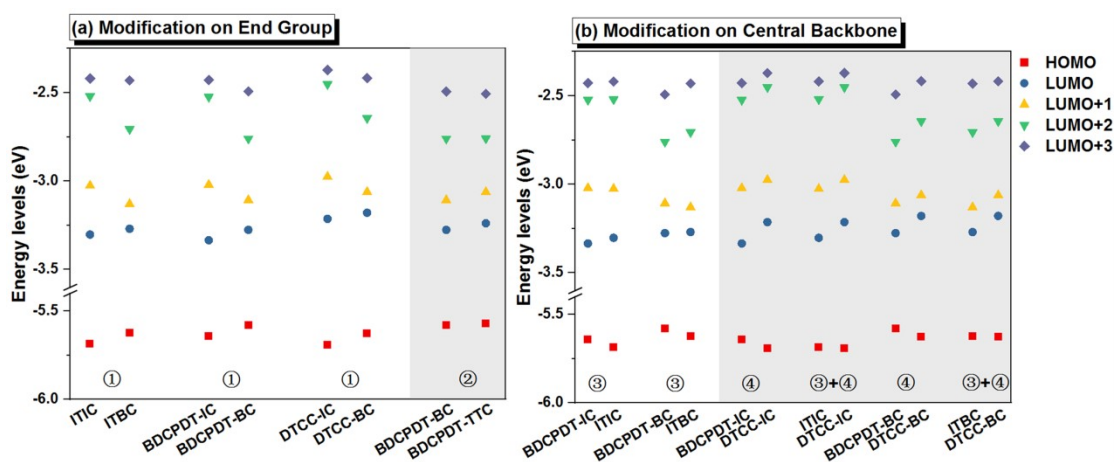

**Figure S3.** Calculated FMO energy levels (eV) of the optimized acceptors (a) modification on end group and (b) modification on central backbone at PBE0/6-31G(d) levels. The white area indicates positively correlated devices and the dark grey shaded area indicates negatively correlated devices. HOMO and LUMO, while LUMO+1 means the adjacent orbital above it and LUMO+2, LUMO+3.

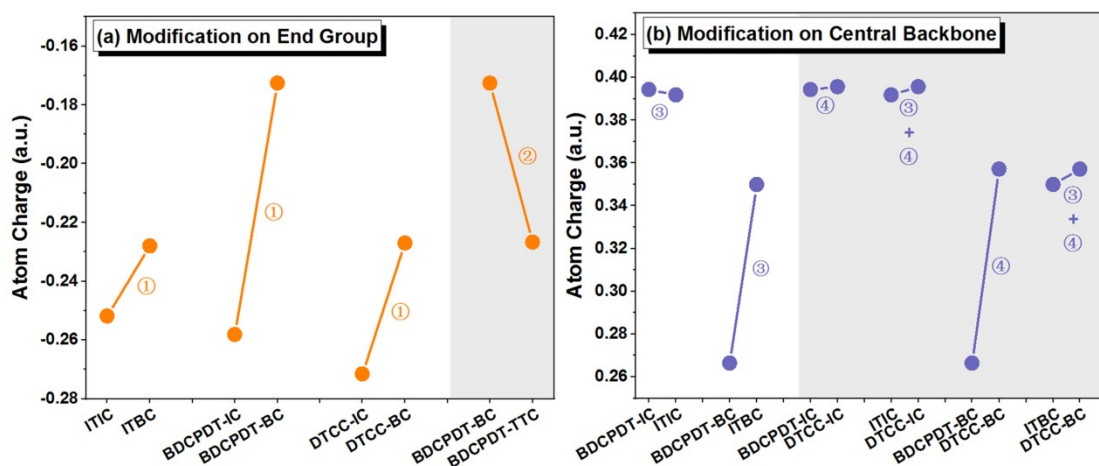

**Figure S4.** Calculated atomic charges (a.u.) of fragment between NFAs for modification on (a) end groups and (b) central backbones adopted atomic dipole moment corrected Hirshfeld population (ADCH) method at the PBE0/6-31G(d) level. When the atomic charge is positive, it indicates that the group has electron-donating property, it indicates that the electron-donating ability increases following the atomic charge increases. While the atomic charge is negative, the group has electron-withdrawing property, it means the withdrawing electron decreases with the increase of the atomic charge.

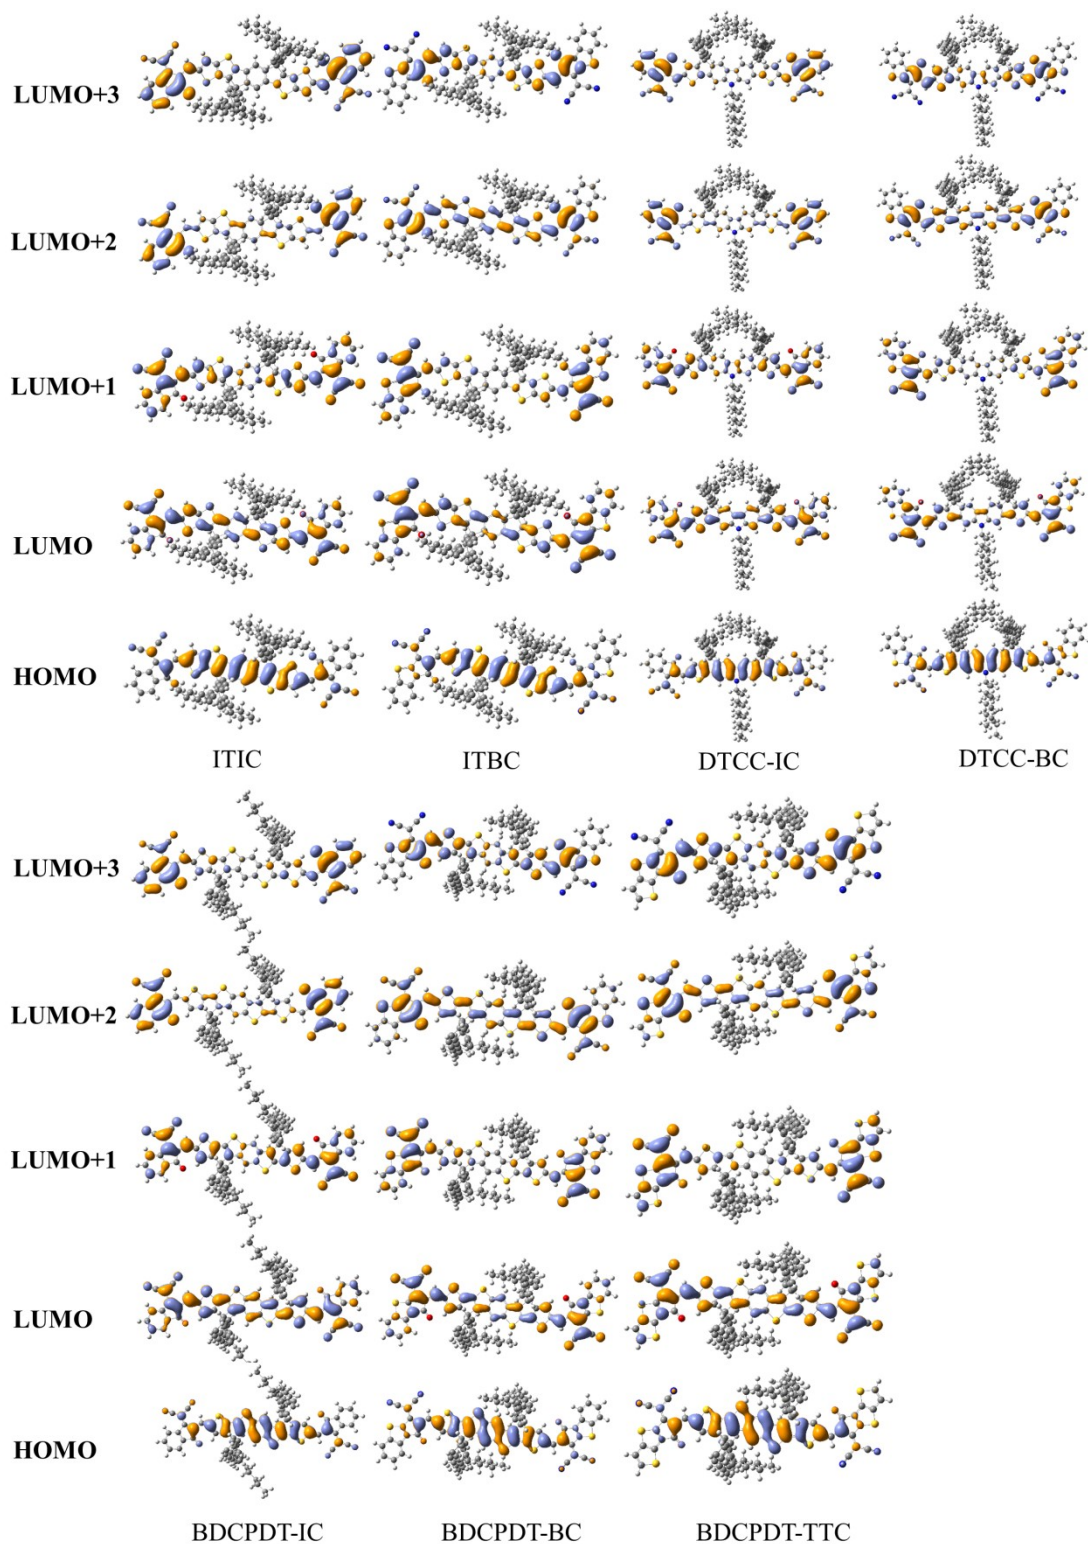

**Figure S5.** The FMOs of ITIC, ITBC, BDCPDT-IC, BDCPCT-BC, BDCPDT-TTC, DTCC-IC, and DTCC-BC at the PBE0/6-31G(d) level.

**Table S1.** Fragment modification of molecules of 10 groups with the positive and negative correlation. All acceptor were blended with same donor PBDB-T. Positive represents positive correlation between  $J_{SC}$  and  $V_{OC}$ , Negative represents negative correlation between  $J_{SC}$  and  $V_{OC}$ .

| Acceptor             | Modification | Location                | Correlation | Refs. |
|----------------------|--------------|-------------------------|-------------|-------|
| ITIC→ITBC            | $e\tau$      | end group               | Positive    |       |
| BDCPDT-IC→BDCPDT-BC  | $e\tau$      | end group               | Positive    |       |
| DTCC-IC→DTCC-BC      | $e\tau$      | end group               | Positive    |       |
| BDCPDT-BC→BDCPDT-TTC | $\&$         | end group               | Negative    |       |
| BDCPDT-IC→DTCC-IC    | ○            | central backbone (D')   | Negative    | [1,2] |
| ITIC→DTCC-IC         | ●+○          | central backbone (D+D') | Negative    |       |
| BDCPDT-BC→DTCC-BC    | ○            | central backbone (D')   | Negative    |       |
| ITBC→DTCC-BC         | ●+○          | central backbone (D+D') | Negative    |       |
| BDCPDT-IC→ITIC       | ●            | central backbone        | Positive    |       |
| BDCPDT-BC→ITBC       | ●            | central backbone        | Positive    |       |

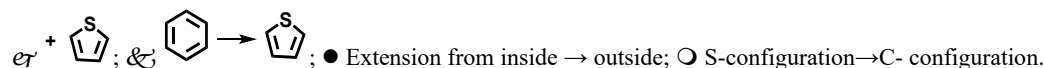

**Table S2.** Experiment condition of Yen-Ju Cheng's and Tang's works for ten molecules.<sup>[1,2]</sup>

|       | Blend ratio (wt %) | Solvent       | Additive      |
|-------|--------------------|---------------|---------------|
| Ref.8 | 1:1                | chlorobenzene | 0.5 vol % DIO |
| Ref.9 | 1:1                | chlorobenzene | 0.5 vol % DIO |

**Table S3.** Photovoltaic parameters about  $J_{SC}$  ( $\text{mA cm}^{-2}$ ),  $\Delta J_{SC}$  ( $\text{mA cm}^{-2}$ ),  $V_{OC}$  (eV) and  $\Delta V_{OC}$  (eV) with the positive and negative correlation. All acceptor were blended with same donor PBDB-T.

|                      | $J_{SC}$    | $\Delta J_{SC}^a$ | $V_{OC}$  | $\Delta V_{OC}^b$ | FF          | PCE         | Refs. |
|----------------------|-------------|-------------------|-----------|-------------------|-------------|-------------|-------|
| ITIC→ITBC            | 16.75→19.90 | 3.15              | 0.92→0.94 | 0.02              | 65.23→64.51 | 10.05→12.07 |       |
| BDCPDT-IC→BDCPDT-BC  | 16.56→18.55 | 1.99              | 0.86→0.92 | 0.06              | 65.52→63.41 | 9.33→10.82  |       |
| DTCC-IC→DTCC-BC      | 14.26→17.22 | 2.96              | 0.97→0.98 | 0.01              | 64.08→63.62 | 9.25→10.74  |       |
| BDCPDT-BC→BDCPDT-TTC | 18.55→17.12 | -1.43             | 0.92→0.92 | 0.00              | 63.41→61.19 | 10.82→9.64  |       |
| BDCPDT-IC→ITIC       | 16.56→16.75 | 0.19              | 0.86→0.92 | 0.06              | 65.52→65.23 | 9.33→10.05  | [1,2] |
| BDCPDT-BC→ITBC       | 18.55→19.90 | 1.35              | 0.92→0.94 | 0.02              | 63.41→64.51 | 10.82→12.07 |       |
| BDCPDT-IC→DTCC-IC    | 16.56→14.26 | -2.30             | 0.86→0.97 | 0.11              | 65.52→64.08 | 9.33→9.25   |       |
| ITIC→DTCC-IC         | 16.75→14.26 | -2.49             | 0.92→0.97 | 0.05              | 65.23→64.08 | 10.05→9.25  |       |
| BDCPDT-BC→DTCC-BC    | 18.55→17.22 | -1.33             | 0.92→0.98 | 0.06              | 63.41→63.62 | 10.82→10.74 |       |
| ITBC→DTCC-BC         | 19.90→17.22 | -2.68             | 0.94→0.98 | 0.04              | 64.51→63.62 | 12.07→10.74 |       |

**Table S4.** Calculated atomic charges (a.u.) of fragment between NFAs adopted atomic dipole moment corrected Hirshfeld population (ADCH) method at the PBE0/6-31G(d) level.

| Molecule   | Fragment charge | $\Delta$ Fragment charge |
|------------|-----------------|--------------------------|
| ITIC       | -0.252          | 0.024                    |
| ITBC       | -0.228          |                          |
| BDCPDT-IC  | -0.258          | 0.086                    |
| BDCPDT-BC  | -0.173          |                          |
| DTCC-IC    | -0.272          | 0.044                    |
| DTCC-BC    | -0.227          |                          |
| BDCPDT-BC  | -0.173          | -0.054                   |
| BDCPDT-TTC | -0.227          |                          |
| BDCPDT-IC  | 0.394           | -0.002                   |
| ITIC       | 0.392           |                          |
| BDCPDT-BC  | 0.266           | 0.084                    |
| ITBC       | 0.350           |                          |
| BDCPDT-IC  | 0.394           | 0.001                    |
| DTCC-IC    | 0.396           |                          |
| ITIC       | 0.392           | 0.004                    |
| DTCC-IC    | 0.396           |                          |
| BDCPDT-BC  | 0.266           | 0.091                    |
| DTCC-BC    | 0.357           |                          |
| ITBC       | 0.350           | 0.007                    |
| DTCC-BC    | 0.357           |                          |

**Table S5.** Calculated singlet excited energies (eV), oscillator strengths ( $f$ ) and composition of singlet excited states for ITIC-series acceptors at the TD-PBE0/6-31G(d) level. Only the  $S_2$  state of DTCC-IC and DTCC-BC with C-conformation are not forbidden transitions, and HOMO-1 and LUMO+1 participate in the electron jump, respectively. For other S-conformations, the oscillator intensity of the  $S_2$  state in which LUMO+1 participates is 0.

| Acceptor   | State | Energy (eV) | $f$   | Composition                 |
|------------|-------|-------------|-------|-----------------------------|
| ITIC       | $S_1$ | 2.018       | 2.590 | H $\rightarrow$ L (97.9%)   |
|            | $S_2$ | 2.357       | 0     | H $\rightarrow$ L+1 (96.6%) |
| ITBC       | $S_1$ | 1.953       | 1.764 | H $\rightarrow$ L (95.3%)   |
|            | $S_2$ | 2.112       | 0     | H $\rightarrow$ L+1 (92.8%) |
| BDCPDT-IC  | $S_1$ | 1.951       | 2.487 | H $\rightarrow$ L (98.2%)   |
|            | $S_2$ | 2.314       | 0     | H $\rightarrow$ L+1 (95.6%) |
| BDCPDT-BC  | $S_1$ | 1.911       | 1.865 | H $\rightarrow$ L (95.7%)   |
|            | $S_2$ | 2.089       | 0     | H $\rightarrow$ L+1 (92.3%) |
| BDCPDT-TTC | $S_1$ | 1.936       | 1.945 | H $\rightarrow$ L (95.7%)   |
|            | $S_2$ | 2.121       | 0     | H $\rightarrow$ L+1 (91.9%) |
| DTCC-IC    | $S_1$ | 2.093       | 2.605 | H $\rightarrow$ L (97.0%)   |
|            | $S_2$ | 2.352       | 0.014 | H-1 $\rightarrow$ L (95.4%) |

|         |                |       |       |               |
|---------|----------------|-------|-------|---------------|
| DTCC-BC | S <sub>1</sub> | 2.023 | 1.724 | H→L (93.2%)   |
|         | S <sub>2</sub> | 2.162 | 0.005 | H→L+1 (89.1%) |

**Table S6.** Calculated the HOMO of donor ( $E_{\text{HOMO}}^{\text{D}}$ ), LUMO of acceptor ( $E_{\text{LUMO}}^{\text{A}}$ ), the stacking distances of donor/acceptor interface model ( $R$ ) and CT-state energies ( $E_{\text{CT}}$ ) (eV), for donor/ITIC-

series acceptors complexes based on  $E_{\text{CT}} = |E_{\text{HOMO}}^{\text{D}} - E_{\text{LUMO}}^{\text{A}}| - 1 / R$ .

|                   | $E_{\text{HOMO}}^{\text{D}}$ | $E_{\text{LUMO}}^{\text{A}}$ | $R$  | $E_{\text{CT}}$ |
|-------------------|------------------------------|------------------------------|------|-----------------|
| PBDB-T:ITIC       | -5.14                        | -3.31                        | 3.74 | 2.08            |
| PBDB-T:ITBC       | -5.14                        | -3.27                        | 3.64 | 2.15            |
| PBDB-T:BDCPDT-IC  | -5.14                        | -3.36                        | 3.82 | 2.04            |
| PBDB-T:BDCPDT-BC  | -5.14                        | -3.28                        | 3.87 | 2.13            |
| PBDB-T:BDCPDT-TTC | -5.14                        | -3.24                        | 3.92 | 2.15            |
| PBDB-T:DTCC-IC    | -5.14                        | -3.21                        | 3.75 | 2.19            |
| PBDB-T:DTCC-BC    | -5.14                        | -3.18                        | 3.74 | 2.23            |

**Table S7.** Experimental energy levels and photovoltaic parameters of devices with positive and negative correlation are used in the machine learning model.

| Donor                       | Acceptor                         | HOMO  | LUMO  | X     | $V_{\text{oc}}$ | $\Delta V_{\text{oc}}$ | $J_{\text{sc}}$ | $\Delta J_{\text{sc}}$ | PCE   | $\Delta \text{PCE}$ | Ref |
|-----------------------------|----------------------------------|-------|-------|-------|-----------------|------------------------|-----------------|------------------------|-------|---------------------|-----|
| <b>Positive correlation</b> |                                  |       |       |       |                 |                        |                 |                        |       |                     |     |
| PBDB-T                      | BDCPDT-BC                        | -5.40 | -3.85 | 0.04  | 0.92            | 0.02                   | 18.55           | 1.35                   | 10.82 | 1.25                | [1] |
| PBDB-T                      | ITBC                             | -5.49 | -3.90 |       | 0.94            |                        | 19.90           |                        | 12.07 |                     |     |
| PBDB-T                      | ITIC                             | -5.61 | -4.01 | -0.01 | 0.92            | 0.02                   | 16.75           | 3.15                   | 10.05 | 2.02                | [1] |
| PBDB-T                      | ITBC                             | -5.49 | -3.9  |       | 0.94            |                        | 19.90           |                        | 12.07 |                     |     |
| PBDB-T                      | DTCC-IC                          | -5.47 | -3.83 | 0.01  | 0.97            | 0.02                   | 14.26           | 2.96                   | 9.25  | 1.49                | [1] |
| PBDB-T                      | DTCC-BC                          | -5.46 | -3.81 |       | 0.98            |                        | 17.22           |                        | 10.74 |                     |     |
| FTAZ                        | IDIC1                            | -5.51 | -3.81 | 0.02  | 0.90            | 0.05                   | 13.6            | 0.7                    | 7.13  | 2.08                | [3] |
| FTAZ                        | IHIC1                            | -5.47 | -3.75 |       | 0.95            |                        | 14.3            |                        | 9.21  |                     |     |
| PTB7-Th                     | F6IC                             | -5.68 | -4.04 | -0.2  | 0.61            | 0.07                   | 18.15           | 4.1                    | 7.00  | 3.7                 | [4] |
| PTB7-Th                     | F8IC1                            | -5.43 | -3.99 |       | 0.68            |                        | 22.25           |                        | 10.70 |                     |     |
| PM6                         | IT-4F                            | -5.74 | -4.26 | -0.03 | 0.85            | 0.01                   | 20.02           | 1.64                   | 12.80 | 0.61                | [5] |
| PM6                         | IOM-4F                           | -5.72 | -4.27 |       | 0.86            |                        | 21.66           |                        | 13.41 |                     |     |
| PM6                         | IOM-4F                           | -5.72 | -4.27 | 0.05  | 0.86            | 0.02                   | 21.66           | 0.46                   | 13.41 | 0.76                | [5] |
| PM6                         | IM-4F                            | -5.69 | -4.19 |       | 0.88            |                        | 22.12           |                        | 14.17 |                     |     |
| PBDB-TF                     | BDT <sub>i</sub> IC- $\gamma$ Cl | -5.21 | -3.89 | -0.04 | 0.81            | 0.08                   | 2.26            | 11.51                  | 6.9   | 0.71                | [6] |
| PBDB-TF                     | BDT <sub>c</sub> IC- $\gamma$ Cl | -5.29 | -4.01 |       | 0.89            |                        | 13.77           |                        | 7.61  |                     |     |
| PM6                         | SiOTC                            | -5.6  | -3.81 | -0.06 | 0.82            | 0.11                   | 4.92            | 8.76                   | 1.73  | 7.13                | [7] |
| PM6                         | SiOTIC                           | -5.57 | -3.84 |       | 0.93            |                        | 13.68           |                        | 8.86  |                     |     |
| PM6                         | Z1-aa                            | -5.67 | -3.84 | -0.01 | 0.98            | 0.02                   | 11.68           | 3.08                   | 4.56  | 5.04                | [8] |



|         |              |       |       |       |       |       |       |       |       |       |      |
|---------|--------------|-------|-------|-------|-------|-------|-------|-------|-------|-------|------|
| PM6     | Z1-ab        | -5.69 | -3.87 |       | 1     |       | 14.76 |       | 9.6   |       |      |
| PBDB-T  | BDCPDT-IC    | -5.41 | -3.87 |       | 0.86  |       | 16.56 |       | 9.33  |       | [1]  |
| PBDB-T  | ITIC         | -5.61 | -4.01 | 0.06  | 0.92  | 0.06  | 16.75 | 0.19  | 10.05 | 0.72  |      |
| PM6     | NOIC3        | -5.83 | -3.95 |       | 0.93  |       | 12.9  |       | 7.15  |       | [9]  |
| PM6     | NOIC4        | -5.64 | -3.9  | -0.14 | 0.94  | 0.01  | 16.8  | 3.9   | 10.1  | 2.95  |      |
| PTB7-Th | F6IC         | -5.66 | -4.02 |       | 0.61  |       | 18.07 |       | 7.1   |       | [10] |
| PTB7-Th | F10IC        | -5.26 | -3.96 | -0.34 | 0.73  | 0.12  | 20.83 | 2.76  | 10.2  | 3.1   |      |
| PTB7-Th | F6IC         | -5.66 | -4.02 |       | 0.61  |       | 18.07 |       | 7.1   |       | [10] |
| PTB7-Th | F8IC         | -5.43 | -4    | -0.21 | 0.64  | 0.03  | 25.12 | 7.05  | 10.9  | 3.8   |      |
| FTAZ    | IHIC2        | -5.69 | -3.86 |       | 0.775 |       | 15.7  |       | 7.45  |       | [11] |
| FTAZ    | IOIC2        | -5.41 | -3.78 | -0.2  | 0.902 | 0.13  | 18.5  | 2.8   | 11.2  | 3.75  |      |
| FTAZ    | F5IC         | -5.82 | -4.05 |       | 0.70  |       | 14.88 |       | 5.60  |       | [12] |
| FTAZ    | F7IC         | -5.74 | -4.01 | -0.04 | 0.74  | 0.038 | 18.43 | 3.55  | 8.20  | 2.6   |      |
| FTAZ    | F7IC         | -5.74 | -4.01 |       | 0.74  |       | 18.43 |       | 8.20  |       | [12] |
| FTAZ    | F9IC         | -5.52 | -3.97 | -0.18 | 0.87  | 0.131 | 20.20 | 1.77  | 11.70 | 3.5   |      |
| PTB7-Th | F5IC         | -5.82 | -4.05 |       | 0.64  |       | 13.89 |       | 5.61  |       | [13] |
| PTB7-Th | AOIC         | -5.50 | -3.93 | -0.2  | 0.74  | 0.102 | 24.50 | 10.61 | 11.90 | 6.29  |      |
| PTB7-Th | F8IC1        | -5.43 | -3.99 |       | 0.68  |       | 22.25 |       | 10.70 |       | [4]  |
| PTB7-Th | F10IC1       | -5.35 | -3.96 | -0.05 | 0.72  | 0.04  | 23.44 | 1.19  | 12.30 | 1.6   |      |
| PM6     | M8           | -5.49 | -3.91 |       | 0.83  |       | 8.36  |       | 4.21  |       | [14] |
| PM6     | M34          | -5.6  | -3.91 | 0.11  | 0.91  | 0.08  | 23.63 | 15.27 | 15.24 | 11.03 |      |
| P3HT    | IDBTC        | -5.25 | -3.54 |       | 0.73  |       | 7.7   |       | 2.5   |       | [15] |
| P3HT    | IDBTCF       | -5.27 | -3.55 | 0.01  | 0.75  | 0.02  | 8.93  | 1.23  | 3.22  | 0.72  |      |
| PTB7-Th | CO5DFIC      | -5.96 | -4.29 |       | 0.59  |       | 12.56 |       | 4.32  |       | [16] |
| PTB7-Th | CO5DFIC-OT   | -5.51 | -3.95 | -0.11 | 0.71  | 0.12  | 17.32 | 4.76  | 5.94  | 1.62  |      |
| PTB7-Th | 4TIC         | -5.36 | -4.11 |       | 0.7   |       | 14.58 |       | 5.26  |       | [17] |
| PTB7-Th | 6TIC         | -5.31 | -3.96 | 0.10  | 0.74  | 0.04  | 19.22 | 4.64  | 8.13  | 2.87  |      |
| PTB7-Th | CO5DFIC      | -5.96 | -4.29 |       | 0.59  |       | 12.56 |       | 4.32  |       | [16] |
| PTB7-Th | CO5DFIC-ST   | -5.55 | -3.92 | -0.04 | 0.74  | 0.15  | 19.23 | 6.67  | 8.45  | 4.13  |      |
| PTB7-Th | CO5DFIC-OT   | -5.51 | -3.95 |       | 0.71  |       | 17.32 |       | 5.94  |       | [16] |
| PTB7-Th | CO5DFIC-ST   | -5.55 | -3.92 | 0.07  | 0.74  | 0.03  | 19.23 | 1.91  | 8.45  | 2.51  |      |
| PBDB-T  | DTNIF        | -5.82 | -3.92 |       | 0.9   |       | 13.26 |       | 7.15  |       | [18] |
| PBDB-T  | DTNSF        | -5.52 | -4    | -0.38 | 0.92  | 0.02  | 14.49 | 1.23  | 8.73  | 1.58  |      |
| PBDB-T  | mOEh-ITIC-F  | -5.77 | -4.23 |       | 0.68  |       | 13.74 |       | 5.79  |       | [19] |
| PBDB-T  | mOEh-ITIC-Cl | -5.74 | -4.22 | -0.02 | 0.69  | 0.01  | 14.19 | 0.45  | 5.78  | -0.01 |      |
| PBDB-T  | mOEh-ITIC-Cl | -5.74 | -4.22 |       | 0.68  |       | 12.32 |       | 4.66  |       | [19] |
| PBDB-T  | mOEh-ITIC    | -5.67 | -4.06 | 0.09  | 0.84  | 0.16  | 12.33 | 0.01  | 6.14  | 1.48  |      |
| J51     | ArSiID-F     | -5.42 | -3.9  |       | 0.78  |       | 10.4  |       | 3.1   |       | [20] |
| J51     | ArSiID       | -5.37 | -3.86 | -0.01 | 0.88  | 0.1   | 14.4  | 4     | 7.4   | 4.3   |      |
| J51     | ArSiID-Cl    | -5.45 | -4.01 |       | 0.78  |       | 10    |       | 2.8   |       | [20] |
| J51     | ArSiID       | -5.37 | -3.86 | 0.07  | 0.88  | 0.1   | 14.4  | 4.4   | 7.4   | 4.6   |      |
| PBDB-T  | NTIC-Me      | -5.53 | -3.73 | 0.03  | 0.963 | 0.002 | 13.03 | 0.49  | 8.3   | 0.31  | [21] |

|           |                       |       |       |       |       |       |       |      |       |           |
|-----------|-----------------------|-------|-------|-------|-------|-------|-------|------|-------|-----------|
| PBDB-T    | NTIC-OMe              | -5.53 | -3.7  |       | 0.965 |       | 13.52 |      | 8.61  |           |
| PTB7-Th   | T4                    | -5.36 | -4.01 | 0.16  | 0.61  | 0.11  | 18.57 | 2.38 | 7.01  | 2.81 [22] |
| PTB7-Th   | T1                    | -5.42 | -3.91 |       | 0.72  |       | 20.95 |      | 9.82  |           |
| PTB7-Th   | T3                    | -5.31 | -4    | 0.07  | 0.61  | 0.06  | 22    | 0.65 | 9.43  | 0.67 [22] |
| PTB7-Th   | T2                    | -5.34 | -3.96 |       | 0.67  |       | 22.65 |      | 10.1  |           |
| PTB7-Th   | T4                    | -5.36 | -4.01 | 0.03  | 0.61  | 0.06  | 18.57 | 4.07 | 7.01  | 3.09 [22] |
| PTB7-Th   | T2                    | -5.34 | -3.96 |       | 0.67  |       | 22.64 |      | 10.1  |           |
| PBDB-T    | BDCPDT-IC             | -5.41 | -3.87 | 0.06  | 0.86  | 0.08  | 16.56 | 1.16 | 9.33  | 0.96 [2]  |
| PBDB-T    | BDCPDT-TTC            | -5.38 | -3.78 |       | 0.94  |       | 17.72 |      | 10.29 |           |
| PBDB-T    | ITIC                  | -5.59 | -3.91 | -0.03 | 0.87  | 0.02  | 15.45 | 1.26 | 7.8   | 2.6 [23]  |
| PBDB-T    | IT-OH                 | -5.57 | -3.92 |       | 0.89  |       | 16.71 |      | 10.4  |           |
| FTAZ      | ITIC-Th               | -5.66 | -3.93 | 0.21  | 0.92  | 0.047 | 15.84 | 0.5  | 8.90  | 1.8 [24]  |
| FTAZ      | ITIC-Th3              | -5.67 | -3.73 |       | 0.96  |       | 16.34 |      | 10.70 |           |
| PBDB-T    | BDCPDT-IC             | -5.41 | -3.87 | 0.01  | 0.86  | 0.06  | 16.56 | 1.99 | 9.33  | 1.49 [1]  |
| PBDB-T    | BDCPDT-BC             | -5.40 | -3.85 |       | 0.92  |       | 18.55 |      | 10.82 |           |
| PM6       | BDSelC4Br             | -5.65 | -4.02 | 0.01  | 0.86  | 0.04  | 16.2  | 3.8  | 9.4   | 2.5 [25]  |
| PM6       | BDSelC2Br             | -5.63 | -3.99 |       | 0.9   |       | 20    |      | 11.9  |           |
| PBDB-T-2F | ITIC-2Br-m            | -5.53 | -3.9  | 0.01  | 0.87  | 0.02  | 18.01 | 1    | 10.88 | 1.17 [26] |
| PBDB-T-2F | ITIC-2Br- $\gamma$    | -5.54 | -3.9  |       | 0.89  |       | 19.01 |      | 12.05 |           |
| PBDB-T    | ITIC                  | -5.61 | -4.02 | 0.01  | 0.9   | 0.04  | 16.8  | 0.64 | 11.22 | 0.83 [27] |
| PBDB-T    | IT-M                  | -5.58 | -3.98 |       | 0.94  |       | 17.44 |      | 12.05 |           |
| FTAZ      | ITIC-Th2              | -5.75 | -4.07 | 0.05  | 0.751 | 0.098 | 17.19 | 2.14 | 9.06  | 3.04 [24] |
| FTAZ      | ITIC-Th1              | -5.74 | -4.01 |       | 0.849 |       | 19.33 |      | 12.1  |           |
| PBDB-TF   | ITIC-Cl- $\delta$ -Th | -5.31 | -3.7  | 0.03  | 0.89  | 0.02  | 17.27 | 1.03 | 11.13 | 1.12 [28] |
| PBDB-TF   | ITIC-Cl- $\gamma$ -Th | -5.3  | -3.66 |       | 0.91  |       | 18.3  |      | 12.25 |           |
| J52       | i-IEICO-F3            | -5.34 | -3.74 | -0.04 | 0.897 | 0.012 | 16.21 | 4.69 | 7.65  | 5.21 [29] |
| J52       | i-IEICO-2F            | -5.29 | -3.73 |       | 0.909 |       | 20.9  |      | 12.86 |           |
| PBDB-T    | BTTIC-0M              | -5.62 | -3.89 | 0.01  | 0.86  | 0.04  | 18.95 | 0.44 | 11.87 | 1.28 [30] |
| PBDB-T    | BTTIC-2M              | -5.60 | -3.86 |       | 0.90  |       | 19.39 |      | 13.15 |           |
| PBDB-T    | i-mO-4Cl              | -5.55 | -3.83 | -0.03 | 0.872 | 0.044 | 15.08 | 6.47 | 7.33  | 6.52 [31] |
| PBDB-T    | i-mO-4F               | -5.5  | -3.81 |       | 0.916 |       | 21.55 |      | 13.85 |           |
| PCE10     | 3e                    | -5.48 | -3.65 | 0.00  | 0.92  | 0.09  | 6.72  | 2.38 | 2.52  | 2.17 [32] |
| PCE10     | 3d                    | -5.42 | -3.59 |       | 1.01  |       | 9.1   |      | 4.69  |           |
| PBDB-T    | IDT-C8-BC             | -5.39 | -3.5  | 0.04  | 1.05  | 0.03  | 10.27 | 0.26 | 7.3   | -1 [33]   |
| PBDB-T    | IDT-BC                | -5.5  | -3.57 |       | 1.08  |       | 10.53 |      | 6.3   |           |
| PTB7-Th   | IDTP-O-C              | -5.47 | -3.75 | -0.01 | 0.77  | 0.02  | 18.08 | 0.7  | 8.61  | -0.4 [34] |
| PTB7-Th   | IDTP-P-C              | -5.43 | -3.72 |       | 0.79  |       | 18.78 |      | 8.21  |           |
| FTAZ      | ITIC1                 | -5.48 | -3.84 | -0.01 | 0.921 | 0.025 | 16.45 | 1.06 | 8.54  | 1.02 [35] |
| FTAZ      | ITIC2                 | -5.43 | -3.8  |       | 0.946 |       | 17.51 |      | 9.56  |           |
| PBT1-C    | IDTT-C6-TIC           | -5.55 | -3.99 | 0.11  | 0.86  | 0.04  | 15.9  | 1.9  | 9.5   | 0.8 [36]  |
| PBT1-C    | IDTT-C8-TIC           | -5.64 | -3.97 |       | 0.9   |       | 17.8  |      | 10.3  |           |
| PBDB-T    | m-F-ITIC              | -5.69 | -3.96 | -0.01 | 0.883 | 0.035 | 15.8  | 2.27 | 8.9   | 2.21 [37] |

|                             |             |       |       |       |       |        |       |       |       |       |      |
|-----------------------------|-------------|-------|-------|-------|-------|--------|-------|-------|-------|-------|------|
| PBDB-T                      | o-F-ITIC    | -5.66 | -3.94 |       | 0.918 |        | 18.07 |       | 11.11 |       |      |
| PBDB-T                      | IDTV-ThIC   | -5.43 | -3.72 | -0.03 | 0.91  | 0.07   | 2.06  | 2.87  | 0.62  | 1.15  | [38] |
| PBDB-T                      | IDTV-PhIC   | -5.52 | -3.84 |       | 0.98  |        | 4.93  |       | 1.77  |       |      |
| PBDB-T                      | IDTV-PhIC   | -5.52 | -3.84 | 0.17  | 0.98  | 0.01   | 4.93  | 6.65  | 1.77  | 9.81  | [38] |
| PBDB-T                      | m-IDTV-PhIC | -5.63 | -3.78 |       | 0.99  |        | 11.58 |       | 11.58 |       |      |
| PBDB-T-2F                   | CIBDT-4Cl   | -5.72 | -3.92 | -0.01 | 0.879 | 0.009  | 19.02 | 0.81  | 11.65 | 0.71  | [39] |
| PBDB-T-2F                   | FBDT-4Cl    | -5.7  | -3.91 |       | 0.888 |        | 19.83 |       | 12.36 |       |      |
| PBDB-T                      | IDTCN-S     | -5.57 | -3.9  | 0.07  | 0.85  | 0.06   | 19.04 | 0.92  | 10.6  | 2.68  | [40] |
| PBDB-T                      | IDTCN-O     | -5.54 | -3.8  |       | 0.91  |        | 19.96 |       | 13.28 |       |      |
| PM6                         | M38         | -5.65 | -3.93 | -0.08 | 0.87  | 0.01   | 18.28 | 1.48  | 8.89  | 2.27  | [41] |
| PM6                         | M2          | -5.6  | -3.96 |       | 0.88  |        | 19.76 |       | 11.16 |       |      |
| PM6                         | M38         | -5.65 | -3.93 | -0.05 | 0.87  | 0.03   | 18.28 | 6.35  | 8.89  | 7.11  | [41] |
| PM6                         | M36         | -5.62 | -3.95 |       | 0.9   |        | 24.63 |       | 16    |       |      |
| PM6                         | M2          | -5.6  | -3.96 | 0.03  | 0.88  | 0.02   | 19.76 | 4.87  | 11.16 | 4.84  | [41] |
| PM6                         | M36         | -5.62 | -3.95 |       | 0.9   |        | 24.63 |       | 16    |       |      |
| <b>Negative correlation</b> |             |       |       |       |       |        |       |       |       |       |      |
| PBDB-T                      | BDCPDT-BC   | -5.40 | -3.85 | 0.05  | 0.92  | 0.02   | 18.55 | -0.83 | 10.82 | -0.53 | [2]  |
| PBDB-T                      | BDCPDT-TTC  | -5.38 | -3.78 |       | 0.94  |        | 17.72 |       | 10.29 |       |      |
| PBDB-T                      | BDCPDT-IC   | -5.41 | -3.87 | 0.10  | 0.86  | 0.11   | 16.56 | -2.3  | 9.33  | -0.08 | [1]  |
| PBDB-T                      | DTCC-IC     | -5.47 | -3.83 |       | 0.97  |        | 14.26 |       | 9.25  |       |      |
| PBDB-T                      | BDCPDT-BC   | -5.40 | -3.85 | 0.10  | 0.92  | 0.06   | 18.55 | -1.33 | 10.82 | -0.08 | [1]  |
| PBDB-T                      | DTCC-BC     | -5.46 | -3.81 |       | 0.98  |        | 17.22 |       | 10.74 |       |      |
| PBDB-T                      | ITIC        | -5.61 | -4.01 | 0.04  | 0.92  | 0.05   | 16.75 | -2.49 | 10.05 | -0.8  | [1]  |
| PBDB-T                      | DTCC-IC     | -5.47 | -3.83 |       | 0.97  |        | 14.26 |       | 9.25  |       |      |
| PBDB-T                      | ITBC        | -5.49 | -3.9  | 0.06  | 0.94  | 0.04   | 19.90 | -2.68 | 12.07 | -1.33 | [1]  |
| PBDB-T                      | DTCC-BC     | -5.46 | -3.81 |       | 0.98  |        | 17.22 |       | 10.74 |       |      |
| PTB7-Th                     | NOIC        | -5.76 | -4.03 | -0.34 | 0.885 | -0.021 | 18.1  | 3.8   | 11.4  | 1.1   | [9]  |
| PTB7-Th                     | NOIC1       | -5.41 | -4.02 |       | 0.864 |        | 21.9  |       | 12.5  |       |      |
| PTB7-Th                     | NOIC3       | -5.83 | -3.95 | -0.23 | 0.93  | -0.003 | 12.9  | 7.7   | 7.15  | 6.95  | [9]  |
| PTB7-Th                     | NOIC2       | -5.64 | -3.99 |       | 0.927 |        | 20.6  |       | 14.1  |       |      |
| PTB7-Th                     | IEICO       | -5.24 | -3.8  | -0.25 | 0.88  | -0.16  | 10.7  | 9.8   | 6     | 4.2   | [42] |
| PTB7-Th                     | IEICO-4F    | -5.44 | -4.25 |       | 0.72  |        | 20.5  |       | 10.2  |       |      |
| PTB7-Th                     | FBTIC       | -5.7  | -3.85 | -0.23 | 0.947 | -0.101 | 14.1  | 6.5   | 10.1  | 2.2   | [43] |
| PTB7-Th                     | FBDIC       | -5.57 | -3.95 |       | 0.846 |        | 20.6  |       | 12.3  |       |      |
| PTB7-Th                     | FNIC1       | -5.61 | -3.92 | -0.13 | 0.774 | -0.033 | 19.97 | 3.96  | 10.3  | 2.7   | [44] |
| PTB7-Th                     | FNIC2       | -5.56 | -4    |       | 0.741 |        | 23.93 |       | 13    |       |      |
| PTB7-Th                     | AOIC        | -5.5  | -3.93 | -0.11 | 0.762 | -0.018 | 11.03 | 13.48 | 13.7  | -9.22 | [13] |
| PTB7-Th                     | IUIC2       | -5.32 | -3.86 |       | 0.74  |        | 24.51 |       | 4.48  |       |      |
| PM6                         | IT-2F       | -5.63 | -4.06 | -0.03 | 0.92  | -0.06  | 19.3  | 1.5   | 12.7  | 0.9   | [45] |
| PM6                         | IT-4F       | -5.68 | -4.14 |       | 0.86  |        | 20.8  |       | 13.6  |       |      |
| PM6                         | IT-3F       | -5.67 | -4.09 | -0.04 | 0.9   | -0.04  | 20    | 0.8   | 13.8  | -0.2  | [45] |
| PM6                         | IT-4F       | -5.68 | -4.14 |       | 0.86  |        | 20.8  |       | 13.6  |       |      |

|         |                         |       |       |       |      |       |      |      |      |       |      |
|---------|-------------------------|-------|-------|-------|------|-------|------|------|------|-------|------|
| PM6     | ITIC-2Cl                | -5.68 | -3.99 |       | 0.92 |       | 19.1 | 3.6  | 10.3 |       |      |
| PM6     | ITIC-4Cl                | -5.75 | -4.09 | -0.03 | 0.79 | -0.13 | 22.7 |      | 13.2 | 2.9   | [46] |
| PM6     | ITIC-2Cl- $\beta$       | -5.3  | -3.71 |       | 0.94 |       | 18.5 |      | 11.2 |       |      |
| PM6     | $\alpha$ -ITIC-2Cl      | -5.29 | -3.77 | -0.07 | 0.88 | -0.06 | 18.9 | 0.4  | 12.2 | 1     | [47] |
| J71     | IT-DM                   | -5.58 | -3.82 |       | 1.02 |       | 16.7 |      | 12.1 |       |      |
| J71     | ITCF                    | -5.59 | -3.95 | -0.12 | 0.91 | -0.11 | 18.5 | 1.8  | 13.3 | 1.2   | [42] |
| PBDB-T  | IO-4H                   | -5.61 | -3.65 |       | 1.12 |       | 5.95 |      | 2.86 |       |      |
| PBDB-T  | IO-4F                   | -5.65 | -3.83 | -0.14 | 1.05 | -0.07 | 12.2 | 6.25 | 8.06 | 5.2   | [43] |
| PBDB-T  | IDTTC                   | -5.4  | -3.72 |       | 1.01 |       | 18.3 |      | 13.5 |       |      |
| PBDB-T  | IDTTTC                  | -5.34 | -3.69 | -0.03 | 1.03 | 0.02  | 14.5 | -3.8 | 6.46 | -7.04 | [48] |
| PM6     | ITIC-Cl- $\gamma$ -Th   | -5.3  | -3.66 |       | 0.91 |       | 18.3 |      | 12.3 |       |      |
| PM6     | ITIC-2Cl-Th             | -5.31 | -3.74 | -0.07 | 0.86 | -0.05 | 18.6 | 0.3  | 11.5 | -0.8  | [49] |
| PTQ10   | m-ITIC-2F               | -5.73 | -3.95 |       | 0.96 |       | 19   |      | 12.5 |       |      |
| PTQ10   | m-ITIC-4F               | -5.73 | -4.02 | -0.07 | 0.9  | -0.06 | 19.8 | 0.8  | 12.5 | 0     | [50] |
| PM6     | POIT-IC2F               | -5.6  | -3.98 |       | 0.97 |       | 18.6 |      | 12.4 |       |      |
| PM6     | POIT-IC4F               | -5.65 | -4.07 | -0.04 | 0.91 | -0.06 | 20.9 | 2.3  | 13.8 | 1.4   | [51] |
| PTB7-Th | C <sub>6</sub> -IDTT-T  | -5.71 | -3.78 |       | 1.05 |       | 14.4 |      | 8.51 |       |      |
| PTB7-Th | 2C <sub>6</sub> -IDTT-T | -5.74 | -3.72 | 0.09  | 1.07 | 0.02  | 13.3 | -1.1 | 7.52 | -0.99 | [52] |
| PM6     | C8-ITCC                 | -5.45 | -3.85 |       | 1.04 |       | 16.1 |      | 10.8 |       |      |
| PM6     | C8-ITCC-Cl              | -5.5  | -3.93 | -0.03 | 0.95 | -0.09 | 17.9 | 1.8  | 12.7 | 1.9   | [53] |
| PBT1-C  | IDTT-C8-TIC             | -5.64 | -3.97 |       | 0.88 |       | 20.3 |      | 13.7 |       |      |
| PBT1-C  | IDTT-C10-TIC            | -5.71 | -3.91 | 0.13  | 0.98 | 0.1   | 18.1 | -2.2 | 12.7 | -1    | [54] |
| PTB7-Th | BT-SFIC                 | -5.46 | -4.04 |       | 0.77 |       | 18.5 |      | 9.52 |       |      |
| PTB7-Th | BT-FIC                  | -5.48 | -4.1  | -0.04 | 0.73 | -0.04 | 21.3 | 2.8  | 10.1 | 0.58  | [55] |
| PM6     | HBDT-4Cl                | -5.67 | -3.9  |       | 0.9  |       | 17.8 |      | 10.4 |       |      |
| PM6     | CIBDT-4Cl               | -5.72 | -3.92 | 0.03  | 0.88 | -0.02 | 19   | 1.2  | 11.7 | 1.3   | [39] |
| PBDB-T  | BTTIC-TT                | -5.54 | -3.8  |       | 0.92 |       | 19.6 |      | 13.4 |       |      |
| PBDB-T  | BTTIC-Ph                | -5.48 | -3.78 | -0.04 | 0.93 | 0.01  | 16.5 | -3.1 | 9.14 | -4.26 | [56] |
| PBDB-T  | SNBDT1-F                | -5.3  | -3.83 |       | 0.86 |       | 21   |      | 12.7 |       |      |
| PBDB-T  | SNBDT2-F                | -5.34 | -3.82 | 0.05  | 0.88 | 0.02  | 13.9 | -7.1 | 6.57 | -6.13 | [57] |
| PBDB-T  | SNBDT1-F                | -5.3  | -3.83 |       | 0.86 |       | 21   |      | 12.7 |       |      |
| PBDB-T  | SNBDT3-F                | -5.36 | -3.8  | 0.09  | 0.9  | 0.04  | 12.5 | -8.5 | 5.87 | -6.83 | [57] |
| PBDB-T  | SNBDT2-F                | -5.34 | -3.82 |       | 0.88 |       | 13.9 |      | 6.57 |       |      |
| PBDB-T  | SNBDT3-F                | -5.36 | -3.8  | 0.04  | 0.9  | 0.02  | 12.5 | -1.4 | 5.87 | -0.7  | [57] |
| PBDB-T  | IPT2F-Ph                | -5.57 | -4    |       | 0.86 |       | 21.2 |      | 13.1 |       |      |
| PBDB-T  | IPT2F-TT                | -5.6  | -4    | 0.03  | 0.84 | -0.02 | 22.2 | 1    | 14   | 0.9   | [58] |
| PM6     | IPTBO-4F                | -5.57 | -4.07 |       | 0.92 |       | 22.1 |      | 14.7 |       |      |
| PM6     | IPT-4Cl                 | -5.58 | -4.11 | -0.03 | 0.88 | -0.04 | 23.2 | 1.1  | 14.4 | -0.3  | [59] |
| PM6     | IN-4F                   | -5.59 | -3.94 |       | 0.92 |       | 19.5 |      | 12.5 |       |      |
| PM6     | IPCl-4F                 | -5.6  | -4.08 | -0.13 | 0.83 | -0.09 | 21.2 | 1.7  | 10.8 | -1.7  | [60] |
| PM6     | INO-4F                  | -5.64 | -3.93 |       | 0.93 |       | 20.5 |      | 13.7 |       |      |
| PM6     | IPCl-4F                 | -5.6  | -4.08 | -0.19 | 0.83 | -0.1  | 21.2 | 0.7  | 10.8 | -2.9  | [60] |

|        |           |       |       |       |      |       |      |       |      |       |      |
|--------|-----------|-------|-------|-------|------|-------|------|-------|------|-------|------|
| P3HT   | l-IDTBTRh | -5.42 | -3.68 |       | 0.86 |       | 8.81 | 5.38  |      |       |      |
| P3HT   | a-IDTBTRh | -5.63 | -3.59 | 0.30  | 0.92 | 0.06  | 5    | -3.81 | 2.53 | -2.85 | [61] |
| J61    | BTA1      | -5.46 | -3.59 |       | 1.24 |       | 5.21 | 3.02  |      |       |      |
| J61    | BTA2      | -5.43 | -3.43 | 0.13  | 1.29 | 0.05  | 0.84 | -4.37 | 0.26 | -2.76 | [62] |
| P3HT   | BTA100    | -5.32 | -3.23 | -0.23 | 1.34 | -0.15 | 1.65 | 3.68  | 1.04 | 2.51  | [63] |
| P3HT   | BTA101    | -5.41 | -3.55 |       | 1.19 |       | 5.33 |       | 3.55 |       |      |
| P3HT   | BTA100    | -5.32 | -3.23 | -0.36 | 1.34 | -0.4  | 1.65 | 6.91  | 1.04 | 4.27  | [63] |
| P3HT   | BTA103    | -5.37 | -3.64 |       | 0.94 |       | 8.56 |       | 5.31 |       |      |
| P3HT   | BTA101    | -5.41 | -3.55 | -0.13 | 1.19 | -0.25 | 5.33 | 3.23  | 3.55 | 1.76  | [63] |
| P3HT   | BTA103    | -5.37 | -3.64 |       | 0.94 |       | 8.56 |       | 5.31 |       |      |
| PM6    | NT-4F     | -5.88 | -3.86 | -0.05 | 0.96 | -0.03 | 13.9 | 2.7   | 9.46 | 1.94  | [64] |
| PM6    | NT-4Cl    | -5.89 | -3.92 |       | 0.93 |       | 16.6 |       | 11.4 |       |      |
| PM6    | T-TT-4F   | -5.44 | -3.51 | -0.04 | 0.86 | -0.05 | 18.5 | 0.5   | 10.5 | -0.3  | [65] |
| PM6    | T-TT-4Cl  | -5.48 | -3.59 |       | 0.81 |       | 19   |       | 10.2 |       |      |
| PM6    | IDT6CN-TM | -5.7  | -3.96 | -0.08 | 0.95 | -0.09 | 17.4 | 0.9   | 12.4 | -1.5  | [66] |
| PM6    | IDT6CN-4F | -5.78 | -4.12 |       | 0.86 |       | 18.3 |       | 10.9 |       |      |
| PBDB-T | SN61C     | -5.38 | -3.93 | -0.04 | 0.88 | -0.1  | 16.5 | 6.7   | 9.6  | 3.6   | [67] |
| PBDB-T | SN61C-4F  | -5.52 | -4.11 |       | 0.78 |       | 23.2 |       | 13.2 |       |      |
| PBDB-T | IXIC      | -5.13 | -3.78 | -0.05 | 0.82 | -0.09 | 20.9 | 2.7   | 11.3 | 0.9   | [68] |
| PBDB-T | IXIC-2Cl  | -5.2  | -3.9  |       | 0.73 |       | 23.6 |       | 12.2 |       |      |
| PM6    | Z1-ab     | -5.69 | -3.87 | -0.04 | 1    | -0.02 | 14.8 | 3.7   | 9.6  | 3.1   | [8]  |
| PM6    | Z1-bb     | -5.7  | -3.92 |       | 0.98 |       | 18.5 |       | 12.7 |       |      |
| PBT1-C | TTPTTT-1C | -5.64 | -3.87 | -0.14 | 1    | -0.08 | 12.5 | 4.3   | 7.91 | 3.59  | [69] |
| PBT1-C | TTPTTT-2F | -5.67 | -4.04 |       | 0.92 |       | 16.8 |       | 11.5 |       |      |
| PBT1-C | TTPTTT-2F | -5.67 | -4.04 | -0.06 | 0.92 | -0.06 | 16.8 | 2.6   | 11.5 | 0.6   | [69] |
| PBT1-C | TTPTTT-4F | -5.69 | -4.12 |       | 0.86 |       | 19.4 |       | 12.1 |       |      |
| PM6    | IOIC2     | -5.7  | -4.16 | -0.09 | 0.97 | -0.05 | 16.3 | 3.7   | 10.5 | 2.3   | [70] |
| PM6    | IOIC3     | -5.64 | -4.19 |       | 0.92 |       | 20   |       | 12.8 |       |      |
| PM6    | IOIC3     | -5.64 | -4.19 | 0.08  | 0.92 | 0.04  | 20   | -2.7  | 12.8 | -1.7  | [70] |
| PM6    | IOIC4     | -5.7  | -4.17 |       | 0.96 |       | 17.3 |       | 11.1 |       |      |
| PM6    | IOIC4     | -5.7  | -4.17 | -0.07 | 0.96 | -0.04 | 17.3 | 3.6   | 11.1 | 2.7   | [70] |
| PM6    | IOIC5     | -5.65 | -4.19 |       | 0.92 |       | 20.9 |       | 13.8 |       |      |
| PM6    | IOIC2     | -5.7  | -4.16 | -0.08 | 0.97 | -0.05 | 16.3 | 4.6   | 10.5 | 3.3   | [70] |
| PM6    | IOIC5     | -5.65 | -4.19 |       | 0.92 |       | 20.9 |       | 13.8 |       |      |
| PM6    | NOIC      | -5.76 | -4.03 | -0.34 | 0.89 | -0.03 | 18.1 | 3.8   | 11.4 | 1.1   | [71] |
| PM6    | NOIC1     | -5.41 | -4.02 |       | 0.86 |       | 21.9 |       | 12.5 |       |      |
| PM6    | NOIC1     | -5.41 | -4.02 | 0.26  | 0.86 | 0.07  | 21.9 | -1.3  | 12.5 | 1.6   | [71] |
| PM6    | NOIC2     | -5.64 | -3.99 |       | 0.93 |       | 20.6 |       | 14.1 |       |      |
| PM6    | NOIC1     | -5.41 | -4.02 | 0.49  | 0.86 | 0.07  | 21.9 | -9    | 12.5 | -5.35 | [71] |
| PM6    | NOIC3     | -5.83 | -3.95 |       | 0.93 |       | 12.9 |       | 7.15 |       |      |
| PM6    | NOIC      | -5.76 | -4.03 | 0.15  | 0.89 | 0.04  | 18.1 | -5.2  | 11.4 | -4.25 | [71] |
| PM6    | NOIC3     | -5.83 | -3.95 |       | 0.93 |       | 12.9 |       | 7.15 |       |      |

|        |         |       |       |       |      |       |      |      |      |      |      |
|--------|---------|-------|-------|-------|------|-------|------|------|------|------|------|
| PM6    | NOIC1   | -5.41 | -4.02 |       | 0.86 |       | 21.9 |      | 12.5 |      |      |
| PM6    | NOIC4   | -5.64 | -3.9  | 0.35  | 0.94 | 0.08  | 16.8 | -5.1 | 10.1 | -2.4 | [71] |
| PM6    | NOIC2   | -5.64 | -3.99 |       | 0.93 |       | 20.6 |      | 14.1 |      |      |
| PM6    | NOIC4   | -5.64 | -3.9  | 0.09  | 0.94 | 0.01  | 16.8 | -3.8 | 10.1 | -4.0 | [71] |
| J71    | ZITI    | -5.59 | -3.74 |       | 0.93 |       | 20.4 |      | 13.2 |      |      |
| J71    | ZITI-3F | -5.64 | -3.76 | 0.03  | 0.9  | -0.03 | 20.7 | 0.3  | 13.2 | 0    | [72] |
| J71    | ZITI-3F | -5.64 | -3.76 | -0.03 | 0.9  | -0.05 | 20.7 | 0.6  | 13.2 | 0    | [73] |
| J71    | ZITI-4F | -5.66 | -3.81 |       | 0.85 |       | 21.3 |      | 13.2 |      |      |
| PBDB-T | FTTCN   | -5.54 | -3.95 |       | 0.9  |       | 15.9 |      | 10.6 |      |      |
| PBDB-T | FTTCN-M | -5.53 | -3.91 | 0.03  | 0.93 | 0.03  | 15.2 | -0.7 | 10.1 | -0.5 | [74] |

**Table S8.** Donor/acceptor blending ratio versus the solvent environment for 112 device preparation conditions that achieve positive correlation.

| Donor   | NFA                              | D:A ratio | Solvent           |
|---------|----------------------------------|-----------|-------------------|
| FTAZ    | IDIC1                            | 1:1.5     | CHCl <sub>3</sub> |
| FTAZ    | IHIC1                            |           |                   |
| PBDB-TF | BDT <sub>i</sub> IC- $\gamma$ Cl | 1:1.2     | chlorobenzene     |
| PBDB-TF | BDT <sub>c</sub> IC- $\gamma$ Cl |           |                   |
| PM6     | SiOTC                            | 1:1.2     | chlorobenzene     |
| PM6     | SiOTIC                           |           |                   |
| PM6     | Z1-aa                            | 1:1       | chlorobenzene     |
| PM6     | Z1-ab                            |           |                   |
| PBDB-T  | BDCPDT-IC                        | 1:1       | chlorobenzene     |
| PBDB-T  | ITIC                             |           |                   |
| PM6     | NOIC3                            | 1:1       | chloroform        |
| PM6     | NOIC4                            |           |                   |
| PTB7-Th | F6IC                             | 1:1.7     | chloroform        |
| PTB7-Th | F10IC                            |           |                   |
| PTB7-Th | F6IC                             | 1:1.7     | chloroform        |
| PTB7-Th | F8IC                             |           |                   |
| FTAZ    | IHIC2                            | 1:1.5     | chloroform        |
| FTAZ    | IOIC2                            |           |                   |
| FTAZ    | F5IC                             | 1:1.5     | chloroform        |
| FTAZ    | F7IC                             |           |                   |
| FTAZ    | F7IC                             | 1:1.5     | chloroform        |
| FTAZ    | F9IC                             |           |                   |
| PTB7-Th | F5IC                             | 1:1.5     | dichlorobenzene   |
| PTB7-Th | AOIC                             |           |                   |
| PTB7-Th | F8IC1                            | 1:1.2     | chloroform        |
| PTB7-Th | F10IC1                           |           |                   |
| PM6     | M8                               | 1:1       | chloroform        |
| PM6     | M34                              |           |                   |
| PTB7-Th | CO5DFIC                          | 1:1       | chlorobenzene     |
| PTB7-Th | CO5DFIC-OT                       |           |                   |
| PTB7-Th | 4TIC                             | 1:1.3     | chloroform        |
| PTB7-Th | 6TIC                             |           |                   |
| PBDB-T  | DTNIF                            | 1:1       | chlorobenzene     |
| PBDB-T  | DTNSF                            |           |                   |
| PBDB-T  | mOEh-ITIC-F                      | 1:1       | chlorobenzene     |
| PBDB-T  | mOEh-ITIC-Cl                     |           |                   |
| PBDB-T  | mOEh-ITIC-Cl                     | 1:1       | Xylene            |
| PBDB-T  | mOEh-ITIC                        |           |                   |
| J51     | ArSiID-F                         | 1:1       | chloroform        |
| J51     | ArSiID                           |           |                   |

|           |                       |        |               |
|-----------|-----------------------|--------|---------------|
| J51       | ArSiID-Cl             |        |               |
| J51       | ArSiID                | 1:1    | chloroform    |
| PBDB-T    | NTIC-Me               |        |               |
| PBDB-T    | NTIC-OMe              | 1: 0.8 | chloroform    |
| PTB7-Th   | T4                    |        |               |
| PTB7-Th   | T1                    | 1:1.8  | chlorobenzene |
| PTB7-Th   | T3                    |        |               |
| PTB7-Th   | T2                    | 1:1.8  | chlorobenzene |
| PTB7-Th   | T4                    |        |               |
| PTB7-Th   | T2                    | 1:1.8  | chlorobenzene |
| PBDB-T    | ITIC                  |        |               |
| PBDB-T    | IT-OH                 | 1:1    | chlorobenzene |
| FTAZ      | ITIC-Th               |        |               |
| FTAZ      | ITIC-Th3              | 1:1.5  | chloroform    |
| PBDB-T    | BDCPDT-IC             |        |               |
| PBDB-T    | BDCPDT-BC             | 1:1    | chlorobenzene |
| PM6       | BDSelC4Br             |        |               |
| PM6       | BDSelC2Br             | 1:1    | chlorobenzene |
| PBDB-T-2F | ITIC-2Br-m            |        |               |
| PBDB-T-2F | ITIC-2Br- $\gamma$    | 1:1    | chlorobenzene |
| PBDB-T    | ITIC                  |        |               |
| PBDB-T    | IT-M                  | 1:1    | chlorobenzene |
| FTAZ      | ITIC-Th2              |        |               |
| FTAZ      | ITIC-Th1              | 1:1.5  | chloroform    |
| PBDB-TF   | ITIC-Cl- $\delta$ -Th |        |               |
| PBDB-TF   | ITIC-Cl- $\gamma$ -Th | 1:1    | chlorobenzene |
| J52       | i-IEICO-F3            |        |               |
| J52       | i-IEICO-2F            | 1:1    | chlorobenzene |
| PBDB-T    | i-mO-4Cl              |        |               |
| PBDB-T    | i-mO-4F               | 1:1    | chlorobenzene |
| PBDB-T    | IDT-C8-BC             |        |               |
| PBDB-T    | IDT-BC                | 1:1.5  | chlorobenzene |
| PTB7-Th   | IDTP-O-C              |        |               |
| PTB7-Th   | IDTP-P-C              | 1:1    | chloroform    |
| FTAZ      | ITIC1                 |        |               |
| FTAZ      | ITIC2                 | 1:1.3  | chloroform    |
| PBT1-C    | IDTT-C6-TIC           |        |               |
| PBT1-C    | IDTT-C8-TIC           | 1:1.3  | chloroform    |
| PBDB-T    | m-F-ITIC              |        |               |
| PBDB-T    | o-F-ITIC              | 1.3:1  | chlorobenzene |
| PBDB-T    | IDTV-ThIC             |        |               |
| PBDB-T    | IDTV-PhIC             | 1:1    | chlorobenzene |
| PBDB-T    | IDTV-PhIC             |        |               |
| PBDB-T    | m-IDTV-PhIC           | 1:1    | chlorobenzene |



|           |           |     |                     |
|-----------|-----------|-----|---------------------|
| PBDB-T-2F | CIBDT-4Cl |     |                     |
| PBDB-T-2F | FBDT-4Cl  | 1:1 | chlorobenzene       |
| PBDB-T    | IDTCN-S   |     |                     |
| PBDB-T    | IDTCN-O   | 1:1 | 1,2-dichlorobenzene |
| PM6       | M38       |     |                     |
| PM6       | M2        | 1:1 | chloroform          |
| PM6       | M38       |     |                     |
| PM6       | M36       | 1:1 | chloroform          |
| PM6       | M2        |     |                     |
| PM6       | M36       | 1:1 | chloroform          |

## II. Calculation Methods

Since PBE0 method could provide an accurate evaluation of geometric and electronic structures for thiophene derivatives.<sup>75-76</sup> The ground geometrical configurations were optimized by density functional theory (DFT) with the PBE0 functional and 6-31G(d) basis set (**Fig. S1**). For the quantum chemical study of molecular systems, the ADCH method shows good reproducibility in terms of charge rationality, basis set dependence, *etc.*<sup>77</sup> Thereby, the atom charges of fragment were calculated adopted ADCH method in Multiwfn 3.8.<sup>78</sup> All calculations were carried out by using the Gaussian 09 package.<sup>79</sup>

## III. Machine learning model: prediction of positive and negative correlation

```
import numpy as np
import matplotlib.pyplot as plt
import pandas as pd
from pandas import read_csv
import scipy
train_set = read_csv('train.csv', dtype = np.float32)
test_set = read_csv('test.csv', dtype = np.float32)
train_data_orig = train_set.values
test_data_orig = test_set.values
train_x = train_data_orig[:, 1:]
train_set_x = train_x.reshape(train_x.shape[0], -1).T
train_set_y = train_data_orig[:, 0]
test_x = test_data_orig[:, 1:]
test_set_x = test_x.reshape(test_x.shape[0], -1).T
test_set_y = test_data_orig[:, 0]
def sigmod(z):
    s = 1/(1+np.exp(-z))
    return s
def initialize_with_zeros(dim):
    w = np.zeros((dim, 1))
    b = 0
    return w, b
def propagate(w, b, X, Y):
    m = X.shape[1]
```

```

Z = np.dot(w.T, X)+b
A = sigmod(Z)
cost = -(np.dot(Y, np.log(A).T)+np.dot((1-Y), np.log(1-A).T))/m
db = np.sum(A-Y)/m
dw = np.dot(X, (A-Y).T)/m
grads = {'dw':dw, 'db':db}
return grads, cost
def optimize(w, b, X, Y, num_ iterations, learning_rate):
    costs = []
    for i in range(num_ iterations):
        grads, cost = propagate(w, b, X, Y)
        dw = grads['dw']
        db = grads['db']
        w = w-learning_rate*dw
        b = b-learning_rate*db
        if i%100 == 0:
            np.squeeze(cost)
            costs.append(cost)

    params = {'w':w, "b":b}

return params, costs
def prediciton(w, b, X):
    m = X.shape[1]
    Y_pred = np.zeros((1, m))
    w = w.reshape(X.shape[0], 1)
    A = sigmod(np.dot(w.T, X)+b)
    for i in range(A.shape[1]):
        if A[0][i]<= 0.5:
            A[0][i] = 0
        else:
            A[0][i] = 1
    Y_pred = A
return Y_pred
def model(X_train, X_test, Y_train, Y_test,num_ iterations = 60000, learning_rate = 0.01):
    w, b = initialize_ with_ zeros(X_train.shape[0])
    parameters, costs = optimize(w, b, X_train, Y_train, num_ iterations, learning_rate)
    w = parameters["w"]
    b = parameters["b"]
    Y_prediction_test = prediciton(w, b, X_test)
    Y_prediction_train = prediciton(w, b, X_train)
    print('train accuracy: {}'.format(100-np.mean(np.abs(Y_prediction_train-Y_train))*100))
    print('test accuracy: {}'.format(100-np.mean(np.abs(Y_prediction_test-Y_test))*100))
    d = {'costs':costs,

```

```

'Y_prediction_test':Y_prediction_test,
'Y_prediction_train':Y_prediction_train,
"w":w,
"b":b,
'learning_rate':learning_rate,
"num_iterations":num_iterations}
print("y = {}x+{}".format(d["w"], d["b"]))
return d

```

```

d = model(train_set_x, test_set_x, train_set_y, test_set_y, num_iterations = 60000, learning_rate = 0.01)
costs = np.squeeze(d['costs'])

```

#### IV. Appendix Full Name

| Full Name                                                                                                                                                                                          | Abbreviation |
|----------------------------------------------------------------------------------------------------------------------------------------------------------------------------------------------------|--------------|
| 3,9-bis(2-methylene-(3-(1,1-dicyanomethylene)-indanone)-5,5,11,11-tetrakis(4-hexyl-phenyl)-dithieno[2,3-d:2',3'-d']-s-indaceno[1,2-b:5,6-b'] dithiophene                                           | ITIC         |
| C6-olefinated2-(3-oxo-2,3-dihydro-1H-benzo[b]cyclopenta[d]thiophen-1-ylidene)-malononitrile with two 2-(3-oxo-2,3-dihydro-1H-benzo[b]cyclopenta[d] thiophen-1-ylidene)-malononitrile (BC) moieties | ITBC         |
| Thieno[3,2-b]thiophene (BDCPDT) with two 1,1-dicyanomethylene-3-indanone (IC) moieties                                                                                                             | BDCPDT-IC    |
| Thieno[3,2-b]thiophene with two 2-(3-oxo-2,3-dihydro-1H-benzo[b]cyclopenta[d] thiophen-1-ylidene)-malononitrile (BC) moieties                                                                      | BDCPDT-BC    |
| Thieno[3,2-b]thiophene with two 2-(5-oxo-5,6-dihydro-7H-cyclopenta[b]thieno [2,3-d]thiophen-7-ylidene)malononitrile (TTC) moieties                                                                 | BDCPDT-TTC   |
| dithienocyclopentacarbazole (DTCC) with two 1,1-dicyanomethylene-3-indanone (IC) moieties                                                                                                          | DTCC-IC      |
| dithienocyclopentacarbazole (DTCC) with two 2-(3-oxo-2,3-dihydro-1H-benzo[b]cyclopenta[d] thiophen-1-ylidene)-malononitrile (BC) moieties                                                          | DTCC-BC      |
| poly[(2,6-(4,8-bis(5-(2-ethylhexyl)thiophen-2-yl)-benzo[1,2-b:4,5-b']dithiophene))-alt-(5,5-(1',3'-di2-thienyl-5',7'-bis(2-ethylhexyl)benzo[1',2'-c:4',5'-']dithiophene-4,8-dione))]               | PBDB-T       |

#### V. References

- (1) Chang, S.-L.; Hung, K.-E.; Cao, F.-Y.; Huang, K.-H.; Hsu, C.-S.; Liao, C.-Y.; Lee, C.-H.; Cheng, Y.-J., Isomerically Pure Benzothiophene-Incorporated Acceptor: Achieving Improved Voc and Jsc of Nonfullerene Organic Solar Cells via End Group Manipulation. *ACS Applied Materials & Interfaces* 2019, 11, 33179-33187.
- (2) Chang, S.-L.; Cao, F.-Y.; Huang, W.-C.; Huang, P.-K.; Huang, K.-H.; Hsu, C.-S.; Cheng, Y.-J., New Thieno[3,2-b]thiophene-Based Acceptor: Tuning Acceptor Strength of Ladder-Type N-Type Materials to Simultaneously Achieve Enhanced Voc and Jsc of Nonfullerene Solar Cells. *ACS Energy Letters* 2018, 3, 1722-1729.
- (3) Zhu, J.; Wu, Y.; Rech, J.; Wang, J.; Liu, K.; Li, T.; Lin, Y.; Ma, W.; You, W.; Zhan, X., Enhancing the performance of a fused-ring electron acceptor via extending benzene to naphthalene.

Journal of Materials Chemistry C 2018, 6, 66-71.

(4) Wang, W.; Lu, H.; Chen, Z.; Jia, B.; Li, K.; Ma, W.; Zhan, X., High-performance NIR-sensitive fused tetrathienoacene electron acceptors. *Journal of Materials Chemistry A* 2020, 8, 3011-3017.

(5) Zhang, Z.; Wang, H.; Yu, J.; Sun, R.; Xu, J.; Yang, L.; Geng, R.; Cao, J.; Du, F.; Min, J.; Liu, F.; Tang, W., Modification on the Indacenodithieno[3,2-b]thiophene Core to Achieve Higher Current and Reduced Energy Loss for Nonfullerene Solar Cells. *Chemistry of Materials* 2020, 32, 1297-1307.

(6) Lai, H.; Guo, M.; Zhu, Y.; Chen, L.; Tan, P.; Yang, C.; He, F., The cis- and trans-orientation of benzo[1,2-b:4,5-b']dithiophene-based isomers in organic solar cells. *Materials Chemistry Frontiers* 2021, 5, 1486-1494.

(7) Qin, Y.; Chen, H.; Yao, J.; Zhou, Y.; Cho, Y.; Zhu, Y.; Qiu, B.; Ju, C. W.; Zhang, Z. G.; He, F.; Yang, C.; Li, Y.; Zhao, D., Silicon and oxygen synergistic effects for the discovery of new high-performance nonfullerene acceptors. *Nat Commun* 2020, 11, 5814.

(8) Zhou, Z.; Duan, J.; Ye, L.; Wang, G.; Zhao, B.; Tan, S.; Shen, P.; Ryu, H. S.; Woo, H. Y.; Sun, Y., Simultaneously improving the photovoltaic parameters of organic solar cells via isomerization of benzo[b]benzo[4,5]thieno[2,3-d]thiophene-based octacyclic non-fullerene acceptors. *Journal of Materials Chemistry A* 2020, 8, 9684-9692.

(9) Li, T.; Wu, Y.; Zhou, J.; Li, M.; Wu, J.; Hu, Q.; Jia, B.; Pan, X.; Zhang, M.; Tang, Z.; Xie, Z.; Russell, T. P.; Zhan, X., Butterfly Effects Arising from Starting Materials in Fused-Ring Electron Acceptors. *J Am Chem Soc* 2020, 142, 20124-20133.

(10) Dai, S.; Li, T.; Wang, W.; Xiao, Y.; Lau, T.-K.; Li, Z.; Liu, K.; Lu, X.; Zhan, X., Enhancing the Performance of Polymer Solar Cells via Core Engineering of NIR-Absorbing Electron Acceptors. *Advanced Materials* 2018, 30, 1706571.

(11) Zhu, J.; Ke, Z.; Zhang, Q.; Wang, J.; Dai, S.; Wu, Y.; Xu, Y.; Lin, Y.; Ma, W.; You, W.; Zhan, X., Naphthodithiophene-Based Nonfullerene Acceptor for High-Performance Organic Photovoltaics: Effect of Extended Conjugation. *Adv Mater* 2018, 30.

(12) Dai, S.; Xiao, Y.; Xue, P.; James Rech, J.; Liu, K.; Li, Z.; Lu, X.; You, W.; Zhan, X., Effect of Core Size on Performance of Fused-Ring Electron Acceptors. *Chemistry of Materials* 2018, 30, 5390-5396.

(13) Jia, B.; Wang, J.; Wu, Y.; Zhang, M.; Jiang, Y.; Tang, Z.; Russell, T. P.; Zhan, X., Enhancing the Performance of a Fused-Ring Electron Acceptor by Unidirectional Extension. *Journal of the American Chemical Society* 2019, 141, 19023-19031.

(14) Ma, Y.; Cai, D.; Wan, S.; Wang, P.; Wang, J.; Zheng, Q., Ladder-Type Heteroheptacenes with Different Heterocycles for Nonfullerene Acceptors. *Angew Chem Int Ed Engl* 2020, 59, 21627-21633.

(15) He, A.; Qin, Y.; Zhou, D.; Ni, C., Effective design of novel low band gap acceptors for non-fullerene solar cells via modulating molecular planarity and F atom substitution. *Materials Letters* 2020, 258, 126785.

(16) Zhang, L.; Jin, K.; Xiao, Z.; Wang, X.; Wang, T.; Yi, C.; Ding, L., Alkoxythiophene and alkylthiophene  $\pi$ -bridges enhance the performance of A-D-A electron acceptors. *Materials Chemistry Frontiers* 2019, 3, 492-495.

(17) Zhang, Z.; Shan, T.; Zhang, Y.; Zhu, L.; Kong, L.; Liu, F.; Zhong, H., Isomerizing thieno[3,4-b]thiophene-based near-infrared non-fullerene acceptors towards efficient organic solar cells. *Journal of Materials Chemistry C* 2020, 8, 4357-4364.

(18) Zhang, M.; Ma, Y.; Zheng, Q., Dithienonaphthalene-Based Non-fullerene Acceptors With Different Bandgaps for Organic Solar Cells. *Front Chem* 2018, 6, 427.

- (19) Sung, M. j.; Park, B.; Choi, J. Y.; Kim, J.; Sun, C.; Kang, H.; Kwon, S.; Jang, S.-Y.; Kim, Y.-H.; Lee, K.; Kwon, S.-K., Spirobifluorene-based non-fullerene acceptors for the environmentally benign process. *Dyes and Pigments* 2020, 180, 108369.
- (20) Wang, C. K.; Jiang, B. H.; Su, Y. W.; Jeng, R. J.; Wang, Y. J.; Chen, C. P.; Wong, K. T., Si-Bridged Ladder-Type Small-Molecule Acceptors for High-Performance Organic Photovoltaics. *ACS Appl Mater Interfaces* 2019, 11, 1125-1134.
- (21) Yi, Y.-Q.-Q.; Feng, H.; Chang, M.; Zhang, H.; Wan, X.; Li, C.; Chen, Y., New small-molecule acceptors based on hexacyclic naphthalene(cyclopentadithiophene) for efficient non-fullerene organic solar cells. *Journal of Materials Chemistry A* 2017, 5, 17204-17210.
- (22) Chen, F. X.; Xu, J. Q.; Liu, Z. X.; Chen, M.; Xia, R.; Yang, Y.; Lau, T. K.; Zhang, Y.; Lu, X.; Yip, H. L.; Jen, A. K.; Chen, H.; Li, C. Z., Near-Infrared Electron Acceptors with Fluorinated Regioisomeric Backbone for Highly Efficient Polymer Solar Cells. *Adv Mater* 2018, 30, e1803769.
- (23) Liu, X.; Wang, X.; Xiao, Y.; Yang, Q.; Guo, X.; Li, C., H - Bonds - Assisted Molecular Order Manipulation of Nonfullerene Acceptors for Efficient Nonannealed Organic Solar Cells. *Advanced Energy Materials* 2020, 10, 1903650.
- (24) Li, Z.; Dai, S.; Xin, J.; Zhang, L.; Wu, Y.; Rech, J.; Zhao, F.; Li, T.; Liu, K.; Liu, Q.; Ma, W.; You, W.; Wang, C.; Zhan, X., Enhancing the performance of the electron acceptor ITIC-Th via tailoring its end groups. *Materials Chemistry Frontiers* 2018, 2, 537-543.
- (25) Wan, S. S.; Chang, C.; Wang, J. L.; Yuan, G. Z.; Wu, Q.; Zhang, M.; Li, Y., Effects of the Number of Bromine Substitution on Photovoltaic Efficiency and Energy Loss of Benzo[1,2 - b:4,5 - b']diselenophene - based Narrow - Bandgap Multibrominated Nonfullerene Acceptors. *Solar RRL* 2018, 1800250.
- (26) Qu, J.; Li, D.; Wang, H.; Zhou, J.; Zheng, N.; Lai, H.; Liu, T.; Xie, Z.; He, F., Bromination of the Small-Molecule Acceptor with Fixed Position for High-Performance Solar Cells. *Chemistry of Materials* 2019, 31, 8044-8051.
- (27) Li, S.; Ye, L.; Zhao, W.; Zhang, S.; Mukherjee, S.; Ade, H.; Hou, J., Energy-Level Modulation of Small-Molecule Electron Acceptors to Achieve over 12% Efficiency in Polymer Solar Cells. *Adv Mater* 2016, 28, 9423-9429.
- (28) Lai, H.; Chen, H.; Shen, Y.; Wang, M.; Chao, P.; Xie, W.; Qu, J.; Yang, B.; He, F., Using Chlorine Atoms to Fine-Tune the Intermolecular Packing and Energy Levels of Efficient Nonfullerene Acceptors. *ACS Applied Energy Materials* 2019, 2, 7663-7669.
- (29) Wu, H.; Zhao, B.; Zhao, H.; Wang, L.; Wang, W.; Cong, Z.; Liu, J.; Ma, W.; Gao, C., Effects of Monofluorinated Positions at the End-Capping Groups on the Performances of Twisted Non-Fullerene Acceptor-Based Polymer Solar Cells. *ACS Appl Mater Interfaces* 2020, 12, 789-797.
- (30) Gao, W.; Liu, T.; Luo, Z.; Zhang, L.; Ming, R.; Zhong, C.; Ma, W.; Yan, H.; Yang, C., Regulating exciton bonding energy and bulk heterojunction morphology in organic solar cells via methyl-functionalized non-fullerene acceptors. *Journal of Materials Chemistry A* 2019, 7, 6809-6817.
- (31) Zhao, B.; Wang, W.; Xie, Y.; Zhao, H.; Wang, L.; Liu, S.; Xin, J.; Cong, Z.; Wu, H.; Liang, Q.; Ma, W.; Gao, C.; Wu, H.; Cao, Y., Efficient Polymer Solar Cells Enabled by Alkoxy-Phenyl Side-Chain-Modified Main-Chain-Twisted Small Molecular Acceptors. *Journal of Materials Chemistry A* 2020, 8, 22335-22345.
- (32) Xiao, L.; Kolaczkowski, M. A.; Min, Y.; Liu, Y., Substitution Effect on Thiobarbituric Acid End Groups for High Open-Circuit Voltage Non-Fullerene Organic Solar Cells. *ACS Appl Mater Interfaces* 2020, 12, 41852-41860.

- (33) Zhang, J.; Lv, J.; Dong, X.; Xu, T.; Dai, X.; Duan, T.; Kan, Z.; Liu, P.; Lu, S., Cyano-functionalized small-molecule acceptors for high-efficiency wide-bandgap organic solar cells. *Journal of Materials Chemistry C* 2020, 8, 9195-9200.
- (34) Pang, Z.; Zhang, W.; Wu, J.; Luo, Y.; Liu, J.; Zhao, S.; Xu, Z.; Lu, Z.; Huang, Y., Insight into the effects of alkoxy side chain position in nonfullerene electron acceptors on the morphological stability of organic solar cells. *Dyes and Pigments* 2020, 181, 108562.
- (35) Wang, J.; Wang, W.; Wang, X.; Wu, Y.; Zhang, Q.; Yan, C.; Ma, W.; You, W.; Zhan, X., Enhancing Performance of Nonfullerene Acceptors via Side-Chain Conjugation Strategy. *Adv Mater* 2017, 29.
- (36) Ye, L.; Weng, K.; Xu, J.; Du, X.; Chandrabose, S.; Chen, K.; Zhou, J.; Han, G.; Tan, S.; Xie, Z.; Yi, Y.; Li, N.; Liu, F.; Hodgkiss, J. M.; Brabec, C. J.; Sun, Y., Unraveling the influence of non-fullerene acceptor molecular packing on photovoltaic performance of organic solar cells. *Nat Commun* 2020, 11, 6005.
- (37) Lee, J.; Go, E. M.; Dharmapurikar, S.; Xu, J.; Lee, S. M.; Jeong, M.; Lee, K. C.; Oh, J.; Cho, Y.; Zhang, C.; Xiao, M.; Kwak, S. K.; Yang, C., Insights into constitutional isomeric effects on donor-acceptor intermolecular arrangements in non-fullerene organic solar cells. *Journal of Materials Chemistry A* 2019, 7, 18468-18479.
- (38) Liang, J.; Yin, P.; Zheng, T.; Wang, G.; Zeng, X.; Cui, C.; Shen, P., Conjugated side-chain optimization of indacenodithiophene-based nonfullerene acceptors for efficient polymer solar cells. *Journal of Materials Chemistry C* 2019, 7, 10028-10038.
- (39) Yuan, G.-Z.; Fan, H.; Wan, S.-S.; Jiang, Z.; Liu, Y.-Q.; Liu, K.-K.; Bai, H.-R.; Zhu, X.; Wang, J.-L., A two-dimensional halogenated thiophene side-chain strategy for balancing Voc and Jsc and improving efficiency of non-fullerene small molecule acceptor-based organic solar cells. *Journal of Materials Chemistry A* 2019, 7, 20274-20284.
- (40) Liu, Y.; Li, M.; Yang, J.; Xue, W.; Feng, S.; Song, J.; Tang, Z.; Ma, W.; Bo, Z., High - Efficiency As - Cast Organic Solar Cells Based on Acceptors with Steric Hindrance Induced Planar Terminal Group. *Advanced Energy Materials* 2019, 9, 1901280.
- (41) Ma, Y.; Cai, D.; Wan, S.; Yin, P.; Wang, P.; Lin, W.; Zheng, Q., Control over  $\pi$ - $\pi$  stacking of heteroheptacene-based nonfullerene acceptors for 16% efficiency polymer solar cells. *National Science Review* 2020, 7, 1886-1895.
- (42) Hao, M.; Liu, T.; Xiao, Y.; Ma, L.-K.; Zhang, G.; Zhong, C.; Chen, Z.; Luo, Z.; Lu, X.; Yan, H.; Wang, L.; Yang, C., Achieving Balanced Charge Transport and Favorable Blend Morphology in Non-Fullerene Solar Cells via Acceptor End Group Modification. *Chemistry of Materials* 2019, 31, 1752-1760.
- (43) Xian, K.; Cui, Y.; Xu, Y.; Zhang, T.; Hong, L.; Yao, H.; An, C.; Hou, J., Efficient Exciton Dissociation Enabled by the End Group Modification in Non-Fullerene Acceptors. *The Journal of Physical Chemistry C* 2020.
- (44) Wang, J.; Zhang, J.; Xiao, Y.; Xiao, T.; Zhu, R.; Yan, C.; Fu, Y.; Lu, G.; Lu, X.; Marder, S. R.; Zhan, X., Effect of Isomerization on High-Performance Nonfullerene Electron Acceptors. *Journal of the American Chemical Society* 2018, 140, 9140-9147.
- (45) Gao, B.; Yao, H.; Hou, J.; Yu, R.; Hong, L.; Xu, Y.; Hou, J., Multi-component non-fullerene acceptors with tunable bandgap structures for efficient organic solar cells. *Journal of Materials Chemistry A* 2018, 6, 23644-23649.
- (46) Zhang, H.; Yao, H.; Hou, J.; Zhu, J.; Zhang, J.; Li, W.; Yu, R.; Gao, B.; Zhang, S.; Hou, J., Over

14% Efficiency in Organic Solar Cells Enabled by Chlorinated Nonfullerene Small-Molecule Acceptors. *Advanced Materials* 2018, 30, 1800613.

(47) Lai, H.; Chen, H.; Zhou, J.; Qu, J.; Wang, M.; Xie, W.; Xie, Z.; He, F., 3D Interpenetrating Network for High-Performance Nonfullerene Acceptors via Asymmetric Chlorine Substitution. *The Journal of Physical Chemistry Letters* 2019, 10.

(48) Deng, M.; Xu, X.; Lee, Y. W.; Ericsson, L. K. E.; Moons, E.; Woo, H. Y.; Li, Y.; Yu, L.; Peng, Q., Fine regulation of crystallisation tendency to optimize the BHJ nanostructure and performance of polymer solar cells. *Nanoscale* 2020, 12, 12928-12941.

(49) Lai, H.; Chen, H.; Shen, Y.; Wang, M.; Chao, P.; Xie, W.; Qu, J.; Yang, B.; He, F., Using Chlorine Atoms to Fine-Tune the Intermolecular Packing and Energy Levels of Efficient Nonfullerene Acceptors. *ACS Applied Energy Materials* 2019, 2019.

(50) Li, X.; Yao, J.; Angunawela, I.; Sun, C.; Xue, L.; Liebman-Pelaez, A.; Zhu, C.; Yang, C.; Zhang, Z.-G.; Ade, H.; Li, Y., Improvement of Photovoltaic Performance of Polymer Solar Cells by Rational Molecular Optimization of Organic Molecule Acceptors. *Advanced Energy Materials* 2018, 8, 1800815.

(51) Fan, Q.; Su, W.; Zhang, M.; Wu, J.; Jiang, Y.; Guo, X.; Liu, F.; Russell, T. P.; Zhang, M.; Li, Y., Synergistic Effects of Side-Chain Engineering and Fluorination on Small Molecule Acceptors to Simultaneously Broaden Spectral Response and Minimize Voltage Loss for 13.8% Efficiency Organic Solar Cells. *Solar RRL* 2019, 3, 1900169.

(52) Xia, T.; Li, C.; Ryu, H. S.; Sun, X.; Woo, H. Y.; Sun, Y., Asymmetrically Alkyl-Substituted Wide-Bandgap Nonfullerene Acceptor for Organic Solar Cells. *Solar RRL* 2020, 4, 2000061.

(53) Zhang, J.; Li, Y.; Hu, H.; Zhang, G.; Ade, H.; Yan, H., Chlorinated Thiophene End Groups for Highly Crystalline Alkylated Non-Fullerene Acceptors toward Efficient Organic Solar Cells. *Chemistry of Materials* 2019, 31, 6672-6676.

(54) Ye, L.; Weng, K.; Xu, J.; Du, X.; Chandrabose, S.; Chen, K.; Zhou, J.; Han, G.; Tan, S.; Xie, Z.; Yi, Y.; Li, N.; Liu, F.; Hodgkiss, J. M.; Brabec, C. J.; Sun, Y., Unraveling the influence of non-fullerene acceptor molecular packing on photovoltaic performance of organic solar cells. *Nature Communications* 2020, 11, 6005.

(55) Li, Y.; Su, W.; Wu, F.; Xu, Z.; Wang, Y.-K.; Zhang, M.; Jiang, Z.-Q.; Liao, L.-S., Near-infrared non-fullerene acceptors based on dithienyl[1,2-b:4,5-b']benzodithiophene core for high performance PTB7-Th-based polymer solar cells. *Organic Electronics* 2019, 65, 63-69.

(56) Liu, T.; Gao, W.; Wang, Y.; Yang, T.; Ma, R.; Zhang, G.; Zhong, C.; Ma, W.; Yan, H.; Yang, C., Unconjugated Side-Chain Engineering Enables Small Molecular Acceptors for Highly Efficient Non-Fullerene Organic Solar Cells: Insights into the Fine-Tuning of Acceptor Properties and Micromorphology. *Advanced Functional Materials* 2019, 29, 1902155.

(57) Zeng, G.; Xin, Y.; Zhang, B.; Ouyang, J.; Zhao, X.; Yang, X., Significantly Increasing the Power Conversion Efficiency by Controlling the Orientation of Nonfullerene Small Molecular Acceptors via Side Chain Engineering. *Solar RRL* 2020, 4, 2000234.

(58) Cao, J.; Wang, H.; Qu, S.; Yu, J.; Yang, L.; Zhang, Z.; Du, F.; Tang, W., 2D Side-Chain Engineered Asymmetric Acceptors Enabling Over 14% Efficiency and 75% Fill Factor Stable Organic Solar Cells. *Advanced Functional Materials* 2020, 30, 2006141.

(59) Yang, L.; Hu, Z.; Zhang, Z.; Cao, J.; Wang, H.; Yu, J.; Zhang, F.; Tang, W., Molecular engineering of acceptors to control aggregation for optimized nonfullerene solar cells. *Journal of Materials Chemistry A* 2020, 8, 5458-5466.

(60) Zhang, Z.; Yang, L.; Hu, Z.; Yu, J.; Liu, X.; Wang, H.; Cao, J.; Zhang, F.; Tang, W., Charge

density modulation on asymmetric fused-ring acceptors for high-efficiency photovoltaic solar cells. *Materials Chemistry Frontiers* 2020, 4, 1747-1755.

(61) Huang, H.; Xiao, B.; Huang, C.; Zhang, J.; Liu, S.; Fu, N.; Zhao, B.; Qin, T.; Zhou, E.; Huang, W., Enhanced open circuit voltage of small molecule acceptors containing angular-shaped indacenodithiophene units for P3HT-based organic solar cells. *Journal of Materials Chemistry C* 2018, 6, 12347-12354.

(62) Tang, A.; Xiao, B.; Wang, Y.; Gao, F.; Tajima, K.; Bin, H.; Zhang, Z.-G.; Li, Y.; Wei, Z.; Zhou, E., Simultaneously Achieved High Open-Circuit Voltage and Efficient Charge Generation by Fine-Tuning Charge-Transfer Driving Force in Nonfullerene Polymer Solar Cells. *Advanced Functional Materials* 2018, 28, 1704507.

(63) Zhang, Q.; Xiao, B.; Du, M.; Li, G.; Tang, A.; Zhou, E., A2-A1-D-A1-A2 type non-fullerene acceptors based on methoxy substituted benzotriazole with three different end-capped groups for P3HT-based organic solar cells. *Journal of Materials Chemistry C* 2018, 6, 10902-10909.

(64) Yan, J.; Yi, Y.-Q.-Q.; Zhang, J.; Feng, H.; Ma, Y.; Wan, X.; Li, C.; Wei, Z.; Chen, Y., A privileged ternary blend enabling non-fullerene organic photovoltaics with over 14% efficiency. *Journal of Materials Chemistry C* 2020, 8, 15135-15141.

(65) Liu, S.; Zhao, B.; Cong, Z.; Cheng, Q.; Wang, W.; Pan, H.; Liu, J.; Wu, H.; Gao, C., Influences of the terminal groups on the performances of asymmetric small molecule acceptors-based polymer solar cells. *Dyes and Pigments* 2020, 178, 108388.

(66) Gao, W.; Wu, F.; Liu, T.; Zhang, G.; Chen, Z.; Zhong, C.; Zhu, L.; Liu, F.; Yan, H.; Yang, C., Multifunctional asymmetrical molecules for high-performance perovskite and organic solar cells. *Journal of Materials Chemistry A* 2019, 7, 2412-2420.

(67) Huang, C.; Liao, X.; Gao, K.; Zuo, L.; Lin, F.; Shi, X.; Li, C.-Z.; Liu, H.; Li, X.; Liu, F.; Chen, Y.; Chen, H.; Jen, A. K. Y., Highly Efficient Organic Solar Cells Based on S,N-Heteroacene Non-Fullerene Acceptors. *Chemistry of Materials* 2018, 30, 5429-5434.

(68) Chen, Y.; Liu, T.; Hu, H.; Ma, T.; Lai, J. Y. L.; Zhang, J.; Ade, H.; Yan, H., Modulation of End Groups for Low-Bandgap Nonfullerene Acceptors Enabling High-Performance Organic Solar Cells. *Advanced Energy Materials* 2018, 8, 1801203.

(69) Li, C.; Song, J.; Ye, L.; Koh, C.; Weng, K.; Fu, H.; Cai, Y.; Xie, Y.; Wei, D.; Woo, H. Y.; Sun, Y., High-Performance Eight-Membered Indacenodithiophene-Based Asymmetric A-D-A Type Non-Fullerene Acceptors. *Solar RRL* 2019, 3, 1800246.

(70) Zhu, J.; Xiao, Y.; Zhang, C.; Jia, B.; Lu, H.; Wang, J.; Lu, X.; Li, Z.; Zhan, X., Effects of alkoxylation position on fused-ring electron acceptors. *Journal of Materials Chemistry C* 2020, 8, 15128-15134.

(71) Li, T.; Wu, Y.; Zhou, J.; Li, M.; Wu, J.; Hu, Q.; Jia, B.; Pan, X.; Zhang, M.; Tang, Z.; Xie, Z.; Russell, T. P.; Zhan, X., Butterfly Effects Arising from Starting Materials in Fused-Ring Electron Acceptors. *Journal of the American Chemical Society* 2020, 142, 20124-20133.

(72) Liu, W.; Zhang, J.; Zhou, Z.; Zhang, D.; Zhang, Y.; Xu, S.; Zhu, X., Design of a New Fused-Ring Electron Acceptor with Excellent Compatibility to Wide-Bandgap Polymer Donors for High-Performance Organic Photovoltaics. *Advanced Materials* 2018, 30, 1800403.

(73) Zhang, J.; Liu, W.; Chen, S.; Xu, S.; Yang, C.; Zhu, X., One-pot synthesis of electron-acceptor composite enables efficient fullerene-free ternary organic solar cells. *Journal of Materials Chemistry A* 2018, 6, 22519-22525.

(74) Ming, R.; Zhang, M.; Gao, W.; Ning, W.; Luo, Z.; Zhong, C.; Zhang, F.; Yang, C., Fluorene-



fused ladder-type non-fullerene small molecule acceptors for high-performance polymer solar cells. *Materials Chemistry Frontiers* 2019, 3, 709-715.

(75) Duan, Y.-A.; Li, H.-B.; Geng, Y.; Wu, Y.; Wang, G.-Y.; and Su, Z.-M., *Organic Electronics*, 2014, 15, 602-613.

(76) Li, M.-Y.; Pan, Y.-Q.; Sun, G.-Y.; Geng, Y., *The Journal of Physical Chemistry Letters*, 2021, 12, 8982-8990.

(77) Lu, T.; Chen, F., *Journal of Computational Chemistry*, 2012, 33, 580-592.

(78) Liu, Y.; Li, M.; Yang, J.; Xue, W.; Feng, S.; Song, J.; Tang, Z.; Ma, W.; Bo, Z., *Advanced Energy Materials*, 2019, 9, 1901280.

(79) Frisch, M. J.; Trucks, G. W.; Schlegel, H. B.; Scuseria, G. E.; Robb, M. A.; Cheeseman, J. R.; Scalmani, G.; Barone, V.; Mennucci, B.; Petersson, G. A.; Nakatsuji, H.; Caricato, M.; Li, X.; Hratchian, H. P.; Izmaylov, A. F.; Bloino, J.; Zheng, G.; Sonnenberg, J. L.; Hada, M.; Ehara, M.; Toyota, K.; Fukuda, R.; Hasegawa, J.; Ishida, M.; Nakajima, T.; Honda, Y.; Kitao, O.; Nakai, H.; Vreven, T.; Throssel, K.; Montgomery, J. A., Jr.; Peralta, J. E.; Ogliaro, F.; Bearpark, M.; Heyd, J. J.; Brothers, E.; Kudin, K. N.; Staroverov, V. N.; Kobayashi, R.; Normand, J.; Raghavachari, K.; Rendell, A.; Burant, J. C.; Iyengar, S. S.; Tomasi, J.; Cossi, M.; Rega, N.; Millam, J. M.; Klene, M.; Knox, J. E.; Cross, J. B.; Bakken, V.; Adamo, C.; Jaramillo, J.; Gomperts, R.; Stratmann, R. E.; Yazyev, O.; Austin, A. J.; Cammi, R.; Pomelli, C.; Ochterski, J. W.; Martin, R. L.; Morokuma, K.; Zakrzewski, V. G.; Voth, G. A.; Salvador, P.; Dannenberg, J. J.; Dapprich, S.; Daniels, A. D.; Farkas, Ö.; Foresman, J. B.; Ortiz, J. V.; Cioslowski, J.; Fox, D. J. *Gaussian 09 Rev. D.01*; Gaussian, Inc.: Wallingford, CT, 2009.
